# Supplementary material for: An Atomistic View on the Mechanism of Diatom Peptide‐Guided Biomimetic Silica Formation
Source: Adv Sci (Weinh). 2024 Jun 14;11(30):2401239. doi: 10.1002/advs.202401239 (PMC11321707; doi:10.1002/advs.202401239)
Supplement: Supplementary file 1 — Supporting Information [file ADVS-11-2401239-s001.pdf]

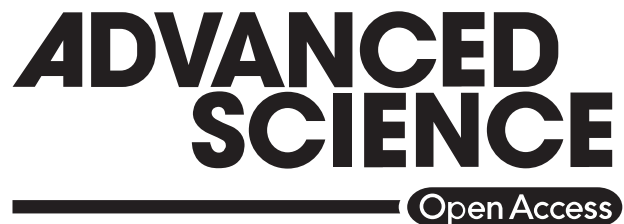

## Supporting Information

for *Adv. Sci.*, DOI 10.1002/adv.202401239

An Atomistic View on the Mechanism of Diatom Peptide-Guided Biomimetic Silica Formation

*Fanny Kozak, Dörte Brandis, Christopher Pötzl, Ludovica M. Epasto, Daniela Reichinger, Dominik Obrist, Herwig Peterlik, Anton Polyansky, Bojan Zagrovic, Fabian Daus, Armin Geyer, Christian FW Becker\* and Dennis Kurzbach\**

## Supporting Information

### An Atomistic View on the Mechanism of Diatom Peptide-guided Biomimetic Silica Formation

Fanny Kozak, Dörte Brandis, Christopher Pötzl, Ludovica M. Epasto, Daniela Reichinger, Dominik Obrist, Herwig Peterlik, Anton Polyansky, Bojan Zagrovic, Fabian Daus, Armin Geyer, Christian FW Becker\*, Dennis Kurzbach\*

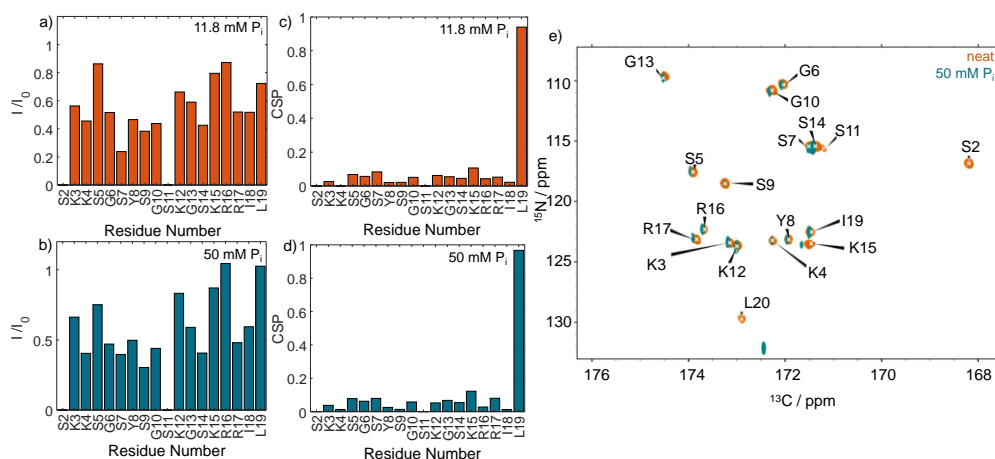

**Figure S1.**  $^{13}\text{C}$ -detected NMR of R5. a,b) Intensity ratios ( $I/I_0$ ) between resonances in the presence (I) and absence ( $I_0$ ) of 12 or 50 mM  $\text{P}_i$ , obtained via  $^1\text{H}^\text{N}$ -CON NMR. c,d) CSP upon  $\text{P}_i$  exposure at concentrations of 11.8 and 50 mM, respectively. e) Comparison of  $^1\text{H}^\text{N}$ -CON spectra in the absence and presence of  $\text{P}_i$  (shown for 50 mM  $\text{P}_i$ , the spectrum at 11.8 mM looked identical).

To probe the structures of R5 within the assemblies by residue-resolved NMR, we employed an approach based on  $^{13}\text{C}$ - $^{15}\text{N}$  correlation spectroscopy. We employed the  $^1\text{H}^\text{N}$ -CON pulse sequence developed by Felli et al.<sup>1</sup> This detection scheme is much less prone to signal loss due to high molecular weights and slow molecular tumbling<sup>2</sup>. Figure S1a-b shows that the signals were reduced upon self-assembly, yet not as strongly ( $<40\%$  at 11.8 mM  $\text{P}_i$ ;  $<60\%$  at 50 mM  $\text{P}_i$ ) as in the  $^1\text{H}$ - $^{15}\text{N}$  HSQC shown in the main text, indicating that resonances of peptide units even within larger structures, which remain elusive in the HSQC, were traceable by  $^{13}\text{C}$ -direct detection. The continuing signal amplitude reduction with increasing  $\text{P}_i$  concentration points towards continuously rising numbers of peptides trapped in the assemblies due to a higher number of  $\text{P}_i$ -salt bridges. Capitalizing on these experiments, the  $^{13}\text{C}$ - $^{15}\text{N}$  CSP upon self-assembly was again determined and found to be similar for both probed  $\text{P}_i$  concentrations (Figure S1), confirming (i) that the average conformational adaptations of R5 are independent of

the assembly size and (ii) that the structural adaptations within the assemblies are also  $P_i$  concentration independent.

Most strikingly, the  $^{15}\text{N}$  transverse relaxation rate constants  $R_2$  increased significantly when going from 11.8 to 50 mM phosphate when measured *via*  $^{13}\text{C}$ -direct detection (Fig. S10). This clearly shows that the R5 self-assemblies continue to grow with increasing counterion concentrations and that the  $^{13}\text{C}$ -detected experiments pick up an average between free species peptide trimers bound within the self-assemblies.

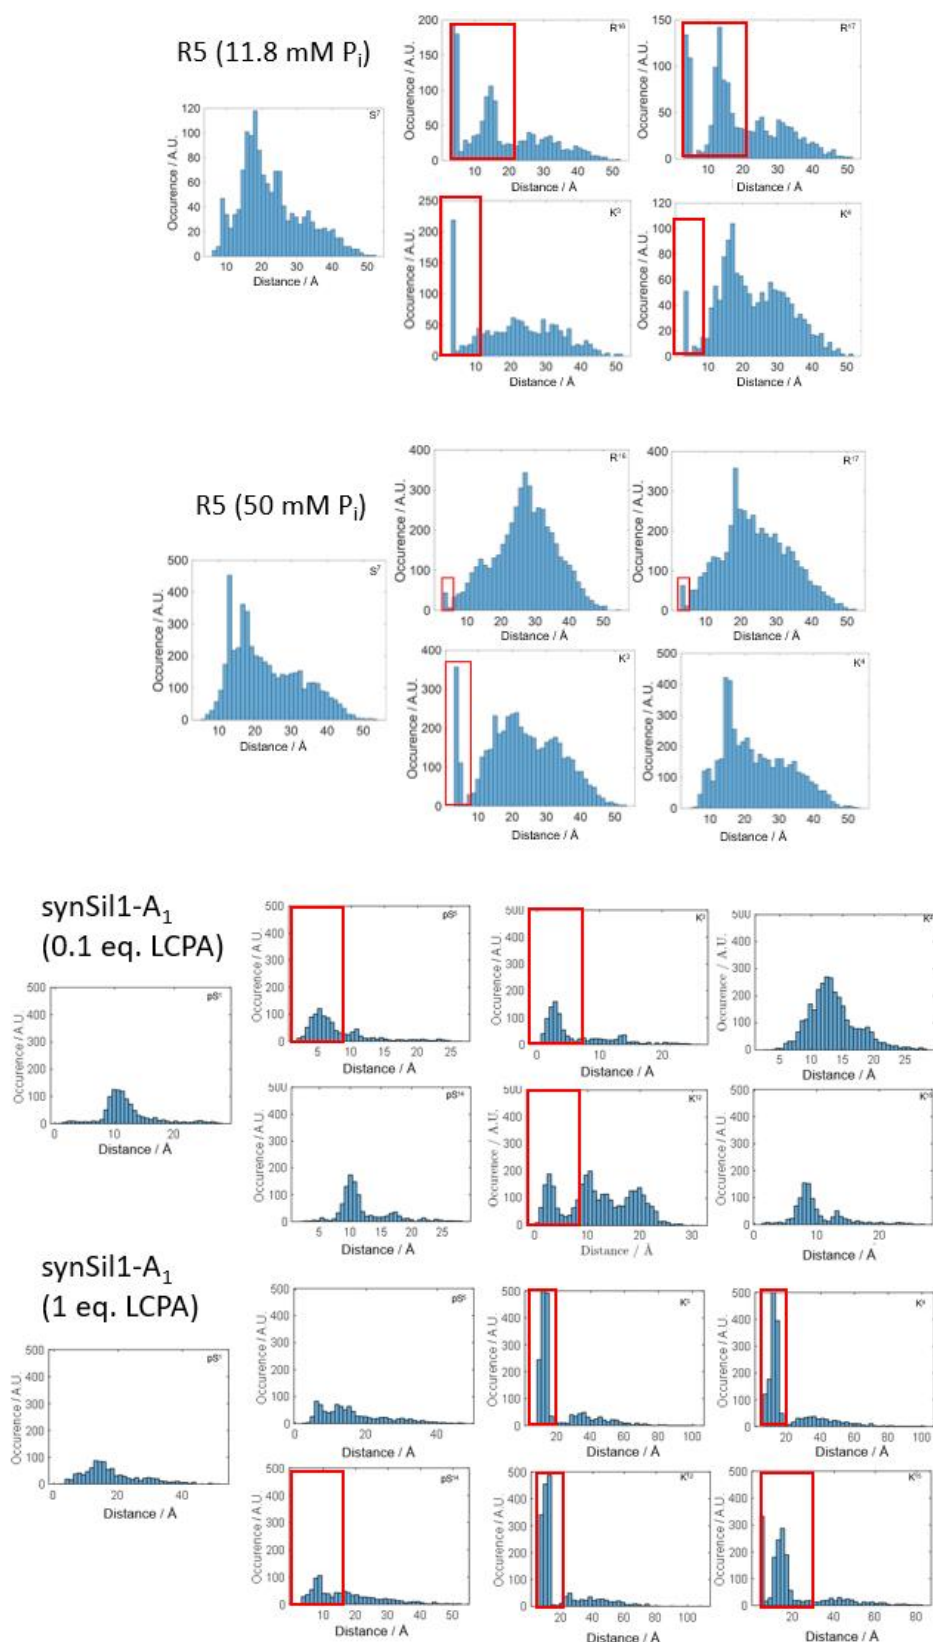

**Figure S2:**  $P_i$ -to-residue distance histograms for the R5 trimer at 11.8 mM and 50 mM  $P_i$  (top) and of LCPA to *synSil1- $A_1$*  trimers (bottom) extracted from the MD simulations simulation. The distinct distance populations < 10 Å correspond to direct contact between a counterion and the residue indicated in the top right of each panel. The red marked peaks are clear signs of

short distances due to the coordination of the counterions to the sidechains of the respective residues.

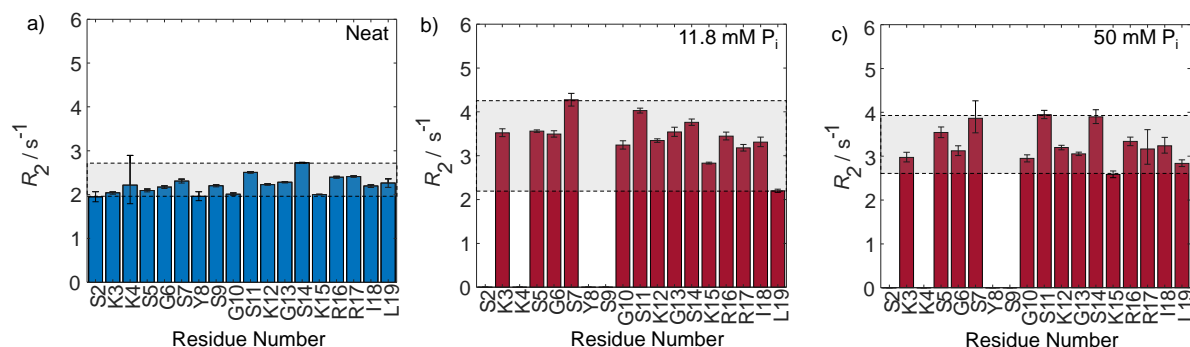

**Figure S3.**  $^{15}\text{N}$ - $R_2$  rates of neat R5 (blue) and in the presence of 11.8 and 50 mM  $\text{P}_i$  (red). The grey shades indicate the range of observed values.

A particular behavior was observed for the R5 transverse relaxation rates  $^{15}\text{N}$ - $R_2$ . Higher values were observed along the entire primary sequence upon exposure to phosphate, indicating globally reduced nanosecond dynamics and/or chemical exchange effects. However, the relaxation rates only slightly changed with growing  $\text{P}_i$  concentration, and the chemical shifts remained unchanged while signal intensities significantly dropped (Fig. 2 of the main text).<sup>3</sup> This points towards the detection of free trimers in solution upon phosphate exposure.

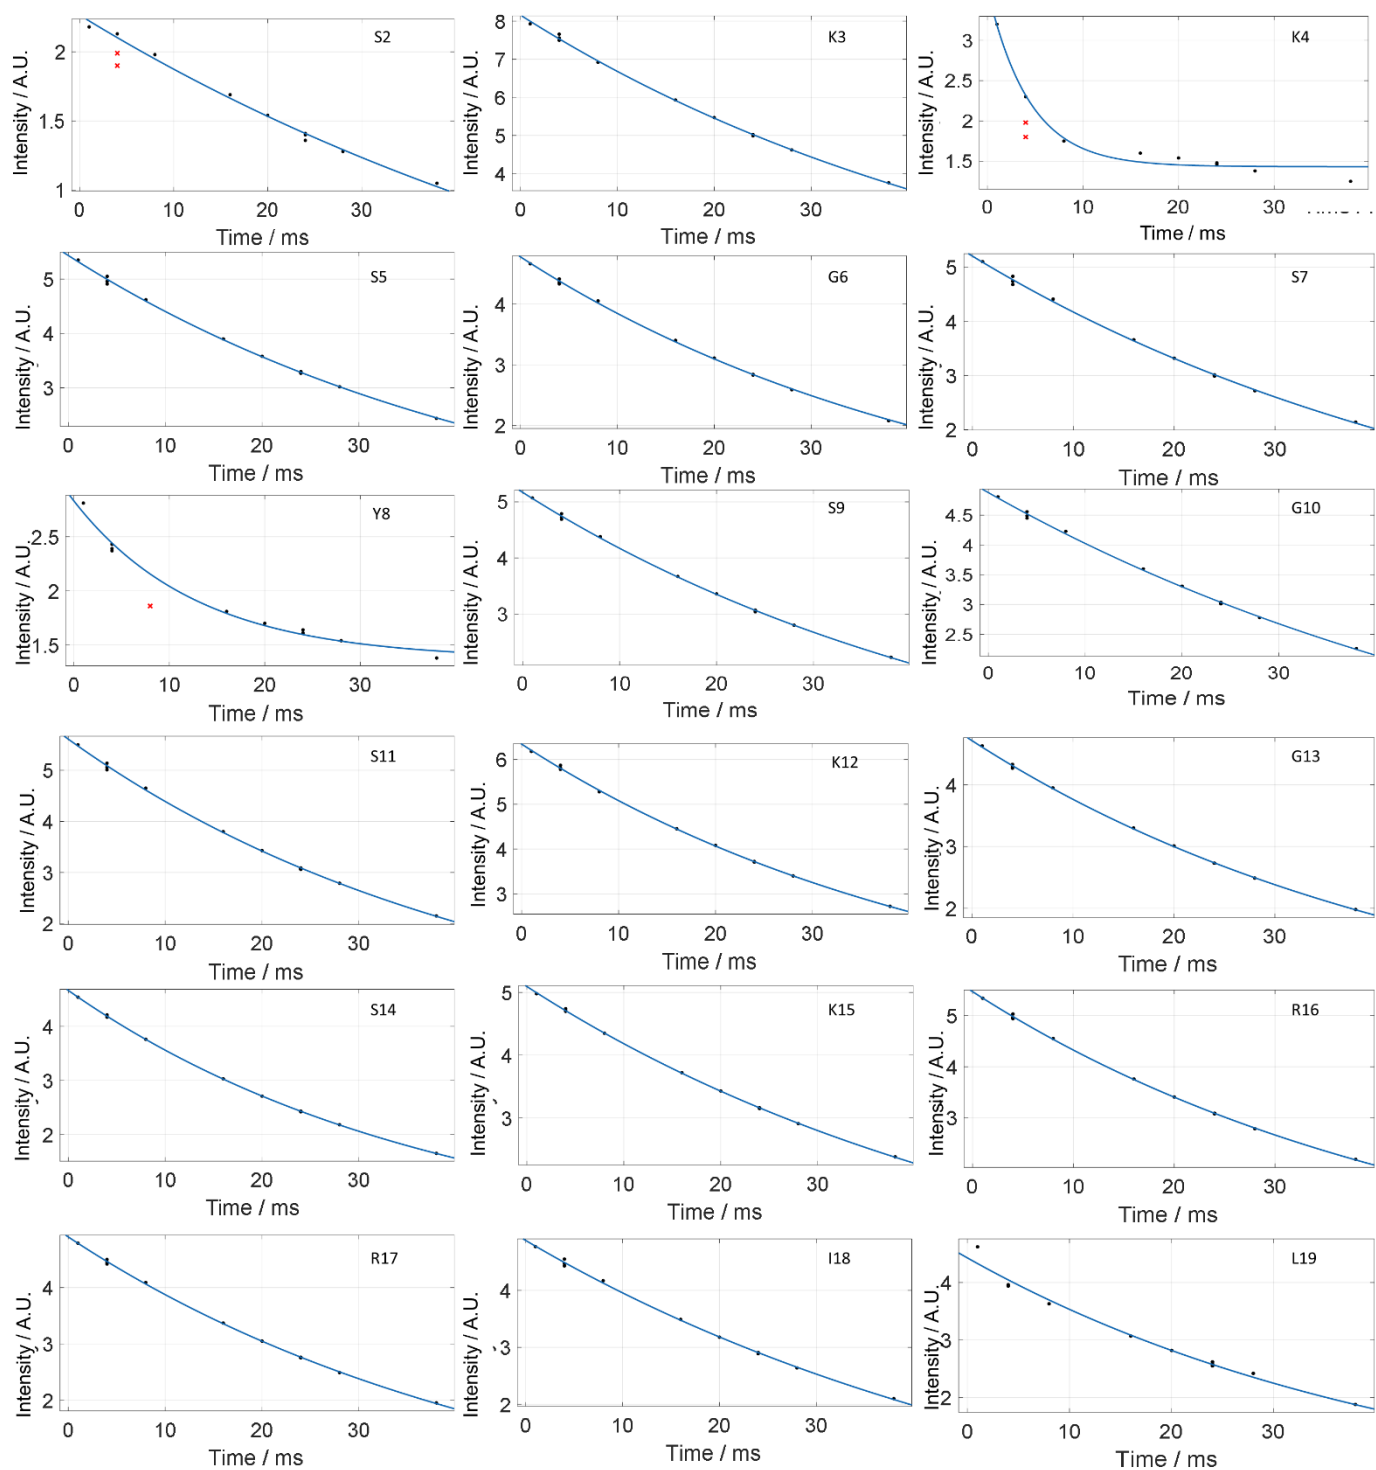

**Figure S4.**  $^1\text{H}$ - $^{15}\text{N}$   $T_2$  Relaxation Fits of R5 in water.

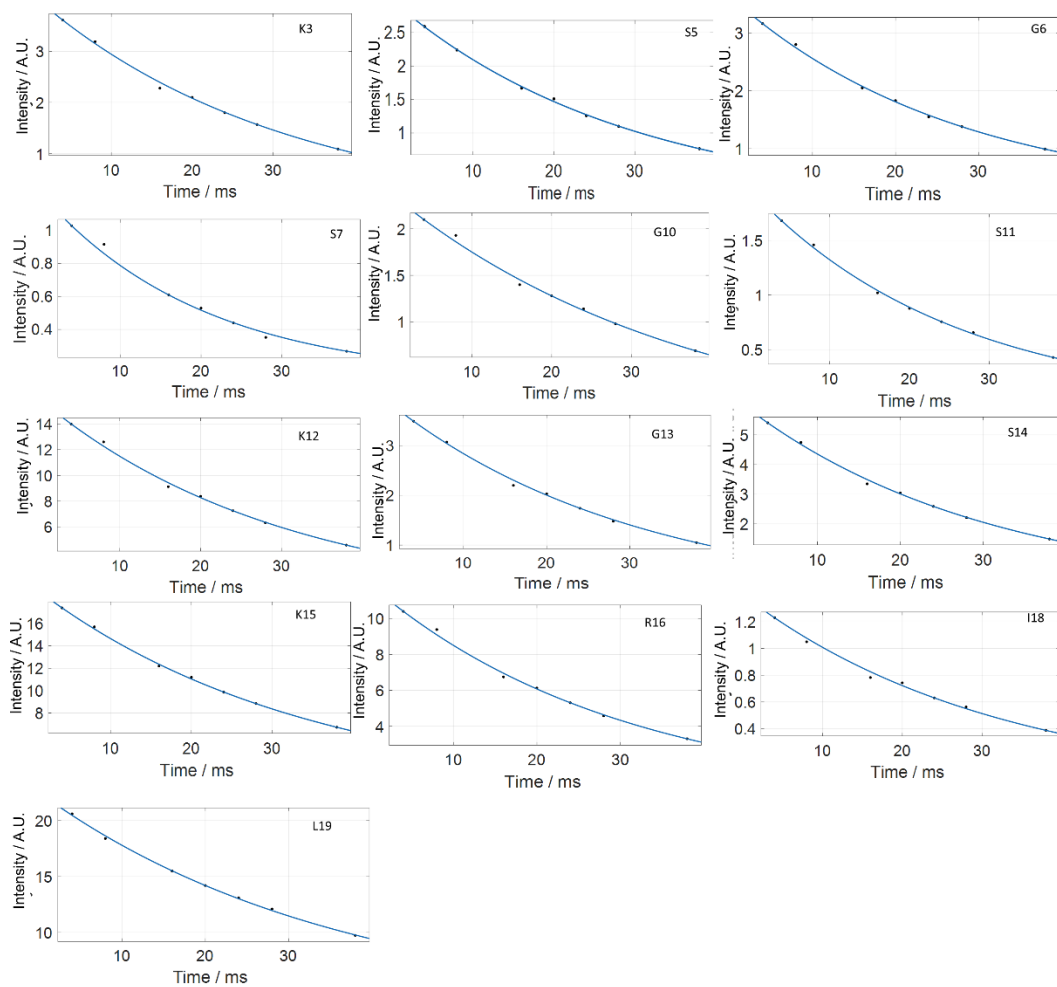

**Figure S5.**  $^1\text{H}$ - $^{15}\text{N}$   $T_2$  relaxation fits of R5 in 11.8 mM  $\text{P}_i$ . Residues not shown are broadened beyond detection.

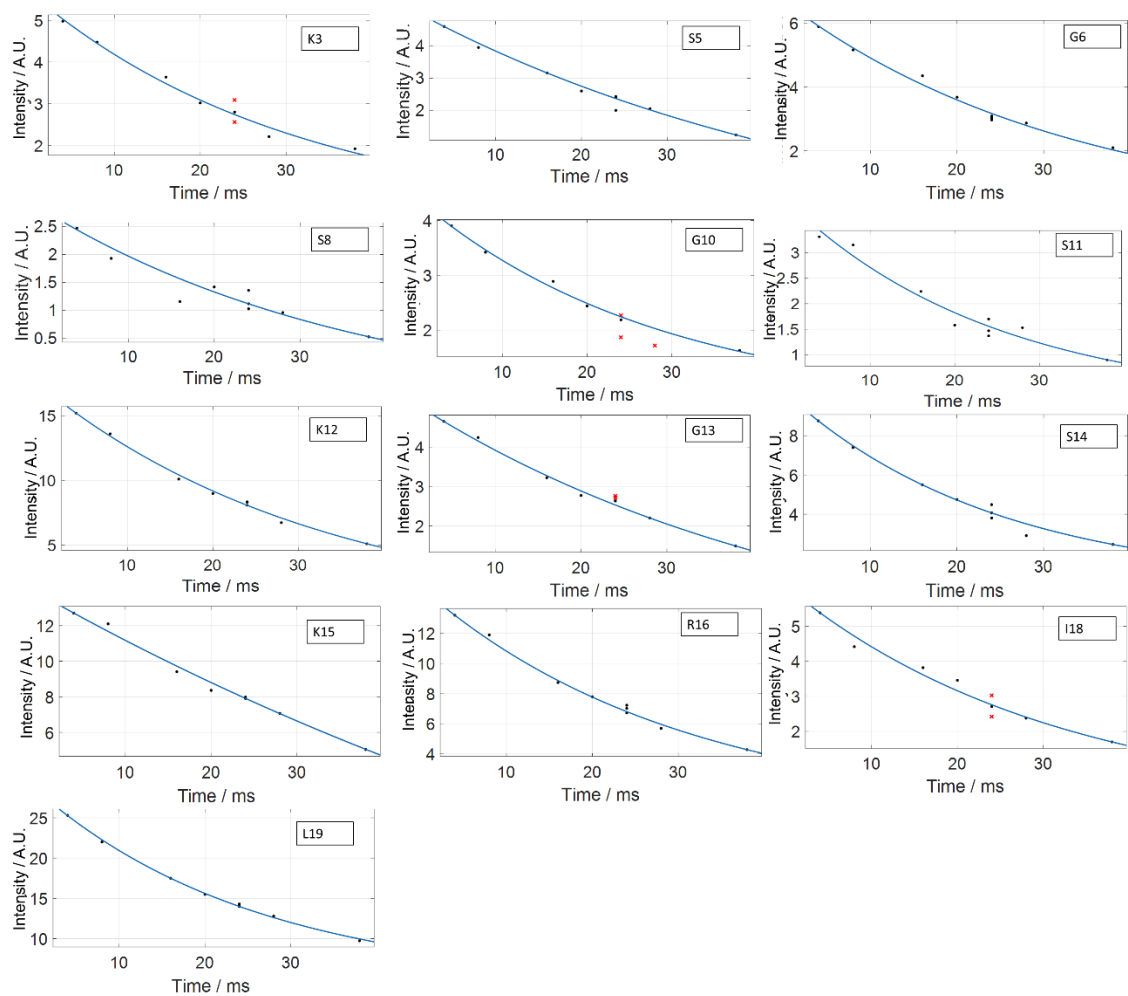

**Figure S6.**  $^1\text{H}$ - $^{15}\text{N}$   $T_2$  relaxation fits of R5 in 50 mM  $\text{P}_i$ . Residues not shown are broadened beyond detection.

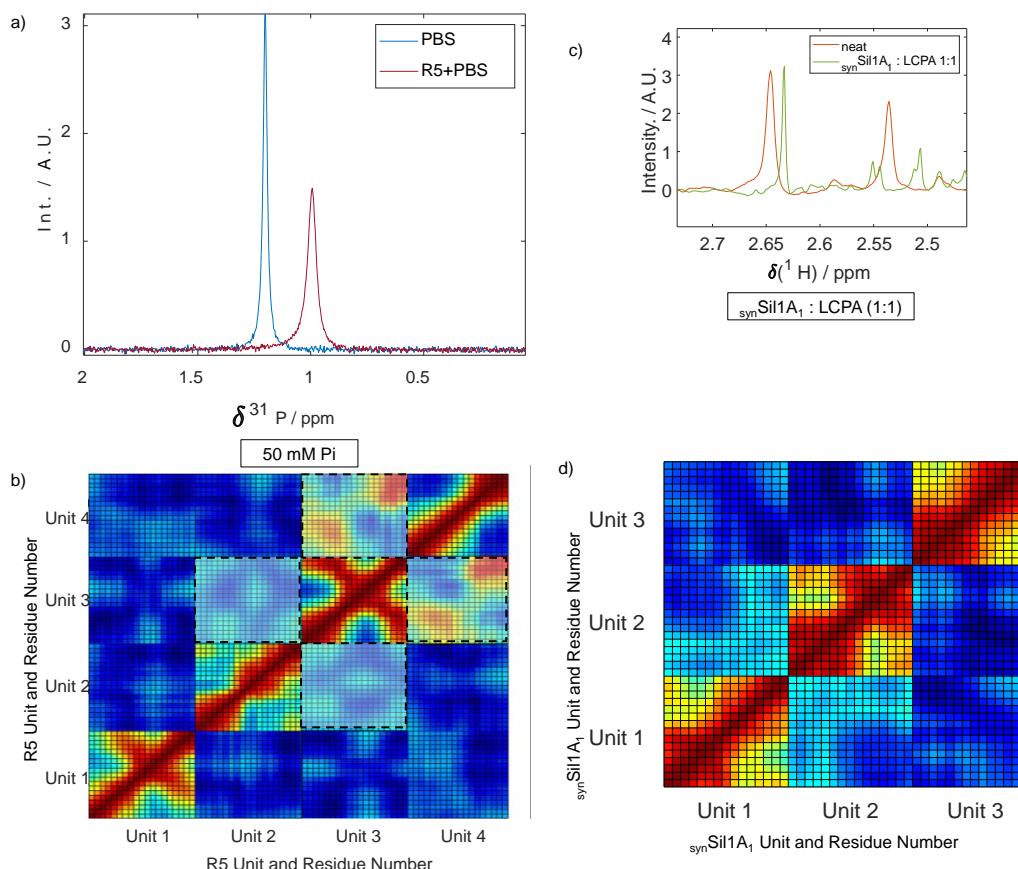

**Figure S7.** a)  $^{31}\text{P}$  NMR of PBS and R5 in PBS at constant ionic strengths. b) Dynamic cross-correlation matrix from MD simulation of R5 in 50 mM  $\text{P}_i$ . c)  $^1\text{H}$  NMR of 1:1  $\text{synSil-1A}_1$  : LCPA and LCPA in buffer. d) Dynamic cross-correlation matrix from MD simulation of 1:1  $\text{synSil-1A}_1$  : LCPA.

We found that the  $^{31}\text{P}$  phosphate chemical shift of the phosphate ions changed significantly and that the linewidth increased upon exposure to R5, indicating close contact with the peptide (Figure S7a). Thus, the phosphate ions can act as “bridges” between the R5 peptides.

Dynamic cross-correlation matrices (DCCM), obtained by correlating the  $\text{C}\alpha$ - $\text{H}\alpha$  vectors for each residue and snapshot of the MD trajectory (after plateauing, see below), then confirmed the ion bridge sites and the peptide trimer structure (Figure S7b). The DCCM correlate residues with similar motions, i.e., those within a stable structural motif (Fig. S7b); hence, mutual binding residues are strongly correlated. The DCCM confirmed firstly that three R5 peptides assembled, while one peptide remained uncorrelated. Secondly, positive matrix elements in the DCCM between the C-terminal RRIL confirm the phosphate binding site. Another N-terminal SKKS motifs acts as a secondary linker between the three units. This was observed for both probed  $\text{P}_i$  concentrations in 6 independent replica runs.

A similar trend was observed for  $\text{synSil-1A}_1$ . Similarly, to the changes in linewidth in  $^{31}\text{P}$  Spectroscopy for R5, peaks assigned to LCPA in  $^1\text{H}$  spectra support a direct binding, as derived

from CSP and line broadening observations upon self-assembly. (Figure S7c). The DCCM analysis of the MD simulations of the underlying peptide-LCPA complexes showed that, again, three *synSil-1A<sub>1</sub>* units exhibit correlated behavior (Figure S7d). We found LCPA forming contact sides, particularly with residues pHyl<sup>12</sup> and pSer<sup>9</sup>.

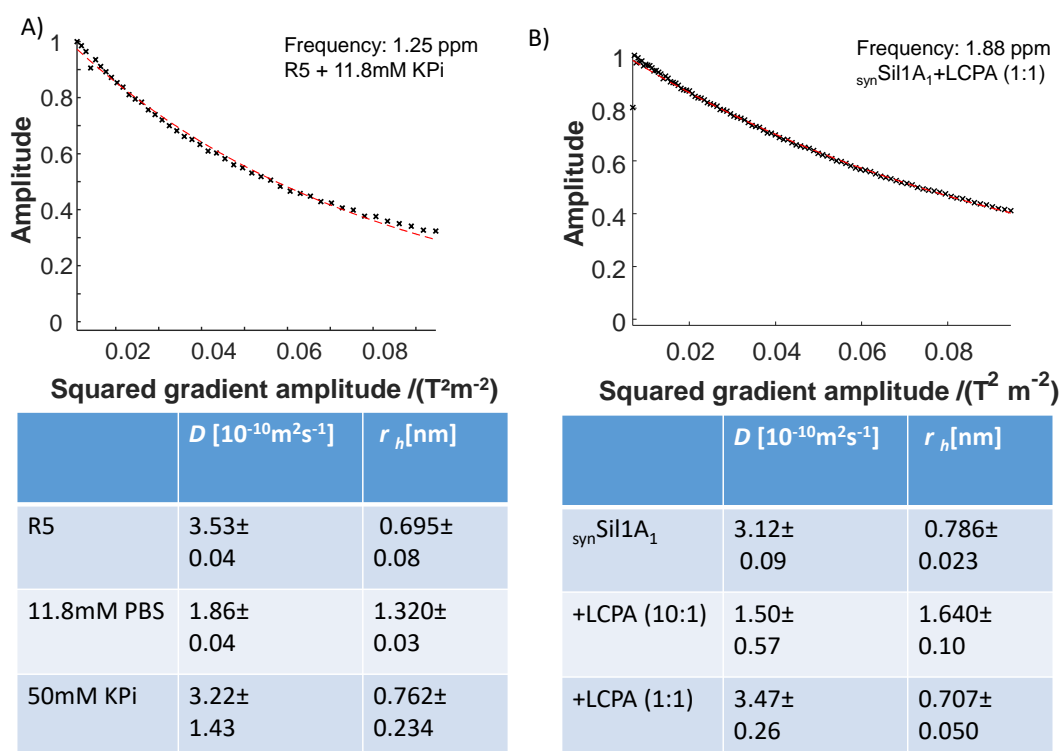

**Figure S8.** A & B) DOSY data for R5 and *synSil-1A<sub>1</sub>* at different counterion concentrations. At low counterion concentrations, a doubled  $R_h$  was found relative to the free peptides in accordance with earlier reports.<sup>4</sup> The resulting three-fold increase in volume suggests three peptide units per cluster. It should be noted that the hydrodynamic radii found by DOSY correspond very well with the radii found in the MD simulations.

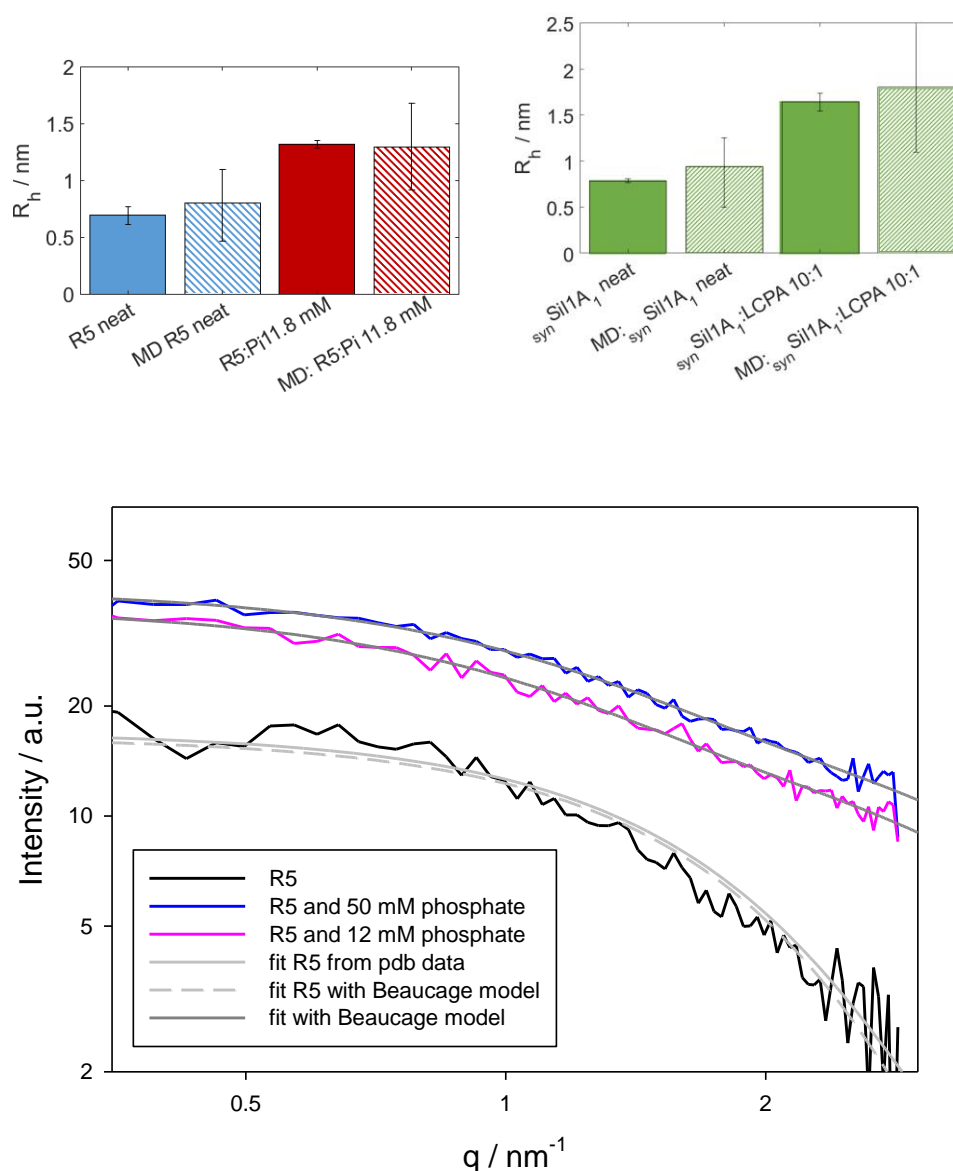

**Fig. S9.** Comparison for hydrodynamic radii determined either experimentally (solid colors) or in MD simulations (striped). The match is good within the precision of the experiments. The error bars correspond to the standard deviations found in the DOSY experiments or the  $R_h$  trajectories in the production MD runs. Bottom: SAXS intensities of R5 (black line), R5+11.8 mM phosphate (pink line), and R5+50mM phosphate (blue line). Fits from a pdb-model (see below) and Beaucage model for R5, light gray lines, and for the samples in phosphate with Beaucage model, dark gray lines.

Fig. S9 shows the scattering intensities of the three single components (R5, 11.8 mM phosphate, 50 mmol phosphate) after background subtraction. The fit curves (fit from pdb data, solid light gray line, from Beaucage model, dashed light gray line) for R5 (black line) are nearly

identical. A value for the radius of gyration of  $R_g = 0.9$  nm was obtained, with an uncertainty of  $\pm 0.2$  nm, estimated from varying fit parameters and the background.

In the case of both R5 and 12 and 50 mM phosphate, scattering intensities are considerably higher and differ from pure R5. As an increase of the scattering intensity is a consequence of a higher electron density difference, this clearly indicates that R5 and phosphate cooperatively form a different structure. A fit with the Beaucage model (dark gray lines) resulted in a slightly larger radius of  $R_g = 1.3$  nm for R5 in 50 mM phosphate and  $R_g = 1.4$  nm for R5 in 11.8 mM phosphate, which are identical within the uncertainty of  $\pm 0.2$  nm.

Due to the high background towards smaller  $q$ -values than  $q = 0.35$  nm<sup>-1</sup>, corresponding to a size in real space of about 20 nm, no statement on the aggregation can be made. This range would be accessible to different techniques such as USAXS or light scattering techniques, where the latter was used in reference <sup>4</sup> additionally to SAXS and SANS measurements. In conclusion, the NMR and SAXS results on the size of R5 with and without phosphate coincide very well.

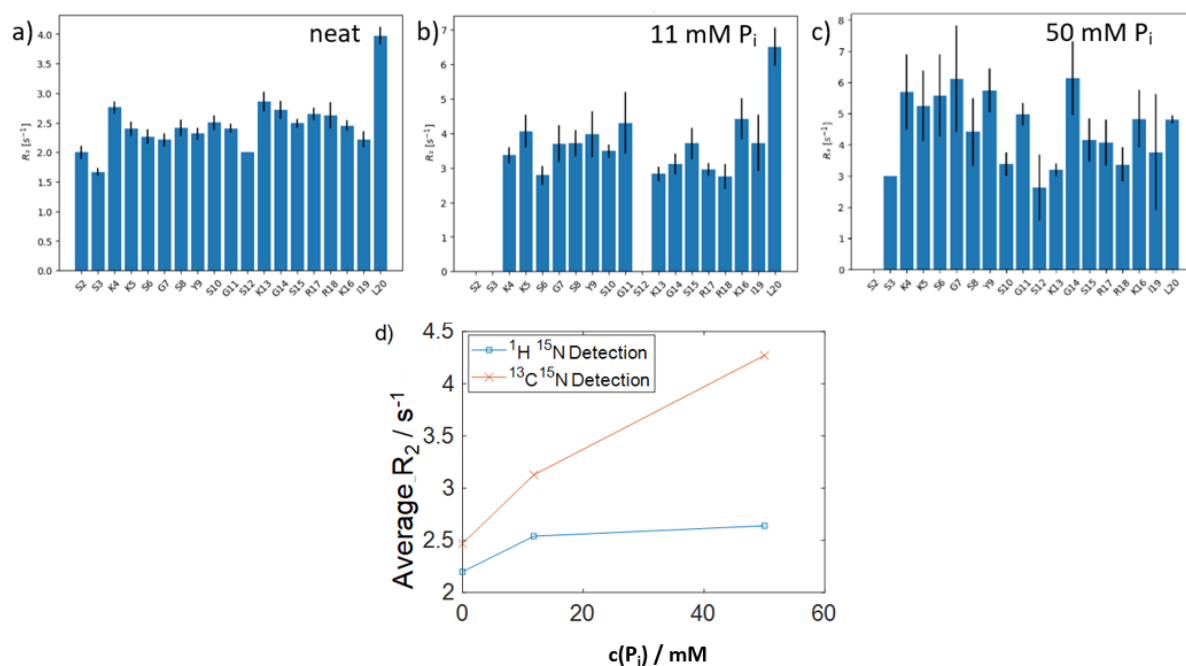

**Figure S10.** <sup>15</sup>N  $R_2$  Relaxation rates measured by <sup>13</sup>C detected NMR for a) neat R5, b) R5 in 11.8 mM P<sub>i</sub> and c) R5 in 50 mM P<sub>i</sub>. d) Comparison of the average increase in  $R_2$  at different P<sub>i</sub> concentrations in <sup>1</sup>H and <sup>13</sup>C detection.

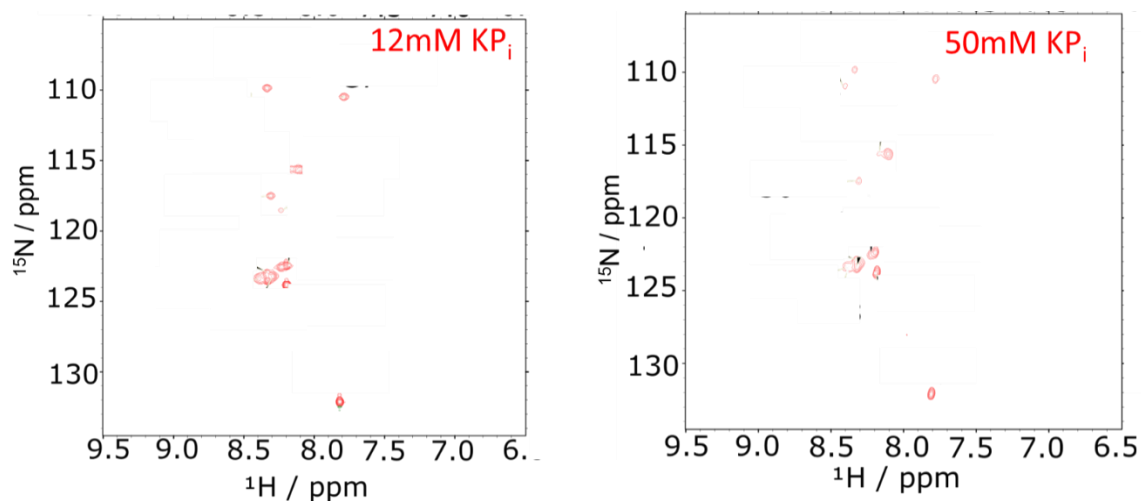

**Fig. S11.**  $^1\text{H}$ - $^{15}\text{N}$  HSQC for  $\text{P}_i$  concentrations of 11.8 mM (left) and 50 mM  $\text{P}_i$  (right). The signal intensities continue to drop due to the formation of assemblies, resulting in line broadening. It should be noted that for all observed resonances, no peak splitting was observed; only chemical shift perturbations were observed.

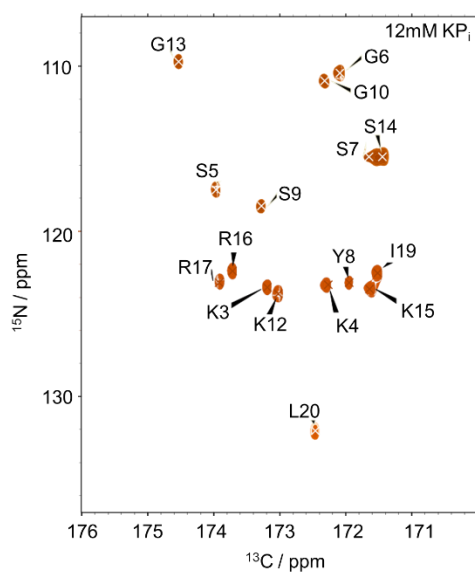

**Fig. S12.**  $^1\text{H}^{\text{N}}$ -CON spectrum for R5 for the 11.8 mM  $\text{P}_i$  case.

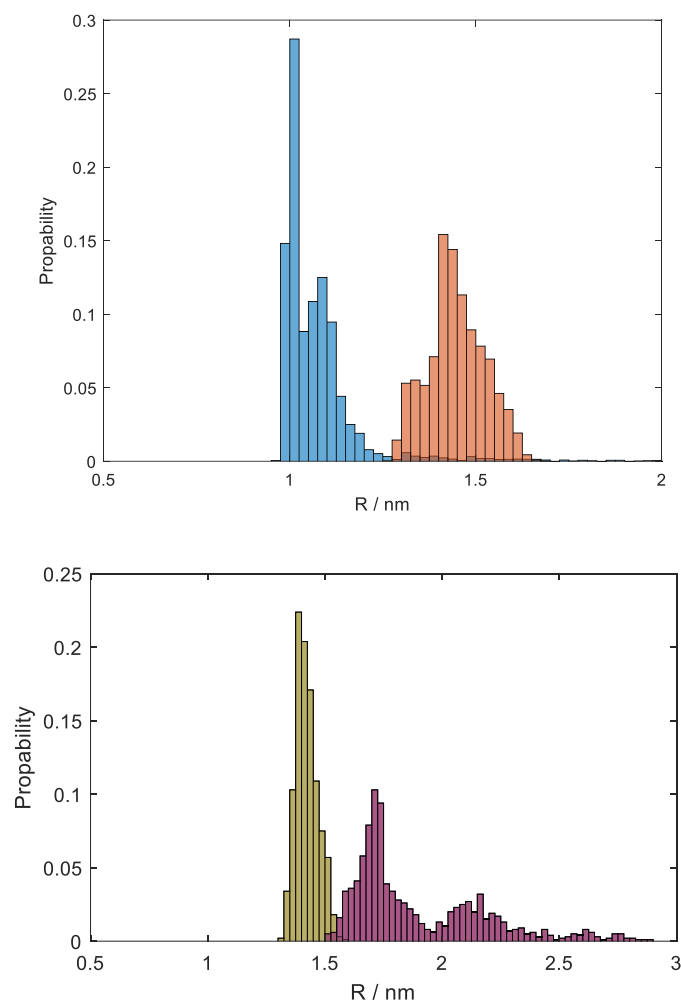

**Figure S13.** Comparison of radii sampled in MD simulations for R5 and *synSil1-A<sub>1</sub>* dimers (blue) and R5 trimers (red). Evidently, the dimer is significantly smaller. The difference is small (as expected by the referee) but significant. A Wilcoxon test yielded p-values of  $7.3 \times 10^{-3}$  and  $1.8 \times 10^{-4}$  for R5 and *synSil1-A<sub>1</sub>*, respectively, ascertaining significantly different distance distributions. The sample size was 1000 for both peptides. All data were normalized to yield a total probability density of 1.

## Supplementary MD Data

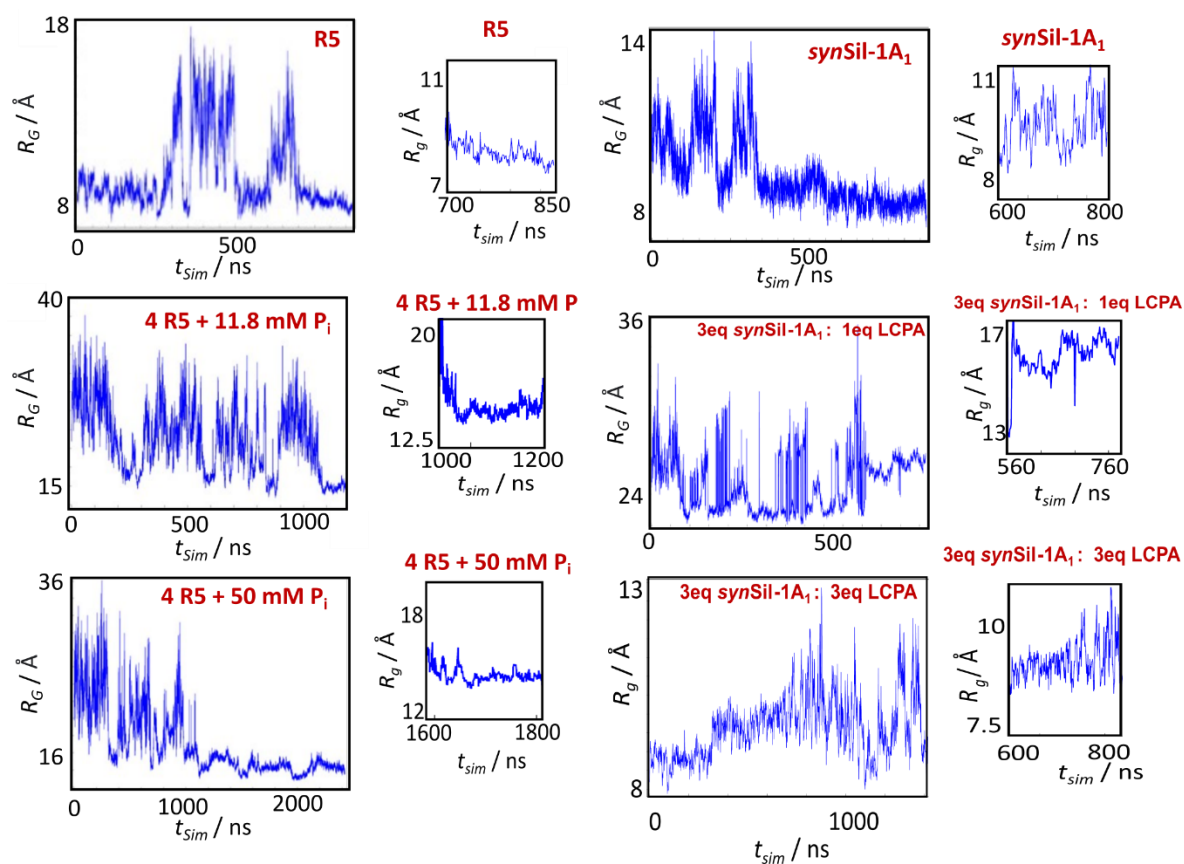

**Fig. S14.** Time traces of radii of gyration for different MD production runs. All replicas and further trajectories can be found in the supporting data sets.



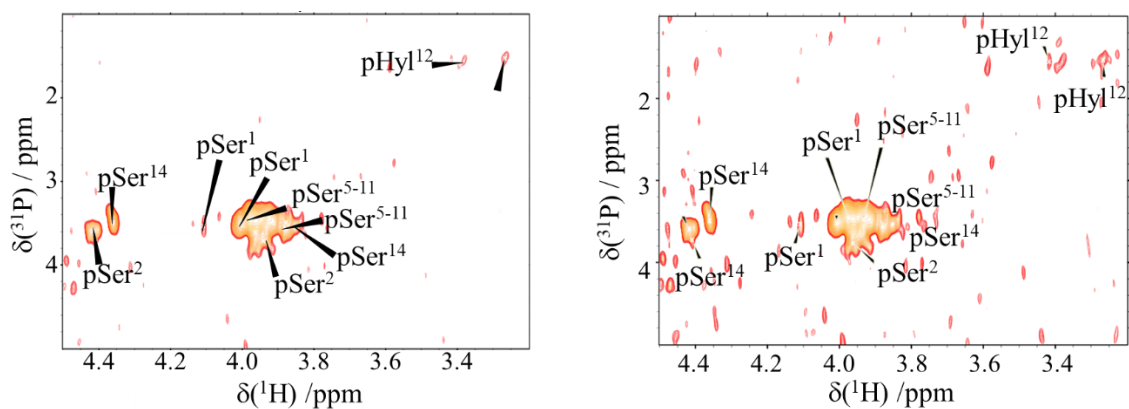

**Fig. S17.**  $^1\text{H}$ - $^{31}\text{P}$  HSQC for *synSil-1A<sub>1</sub>* : LCPA 10:1 (left) and 1:1 (right). The signal intensities continue to drop due to the formation of PNS, which results in line broadening.

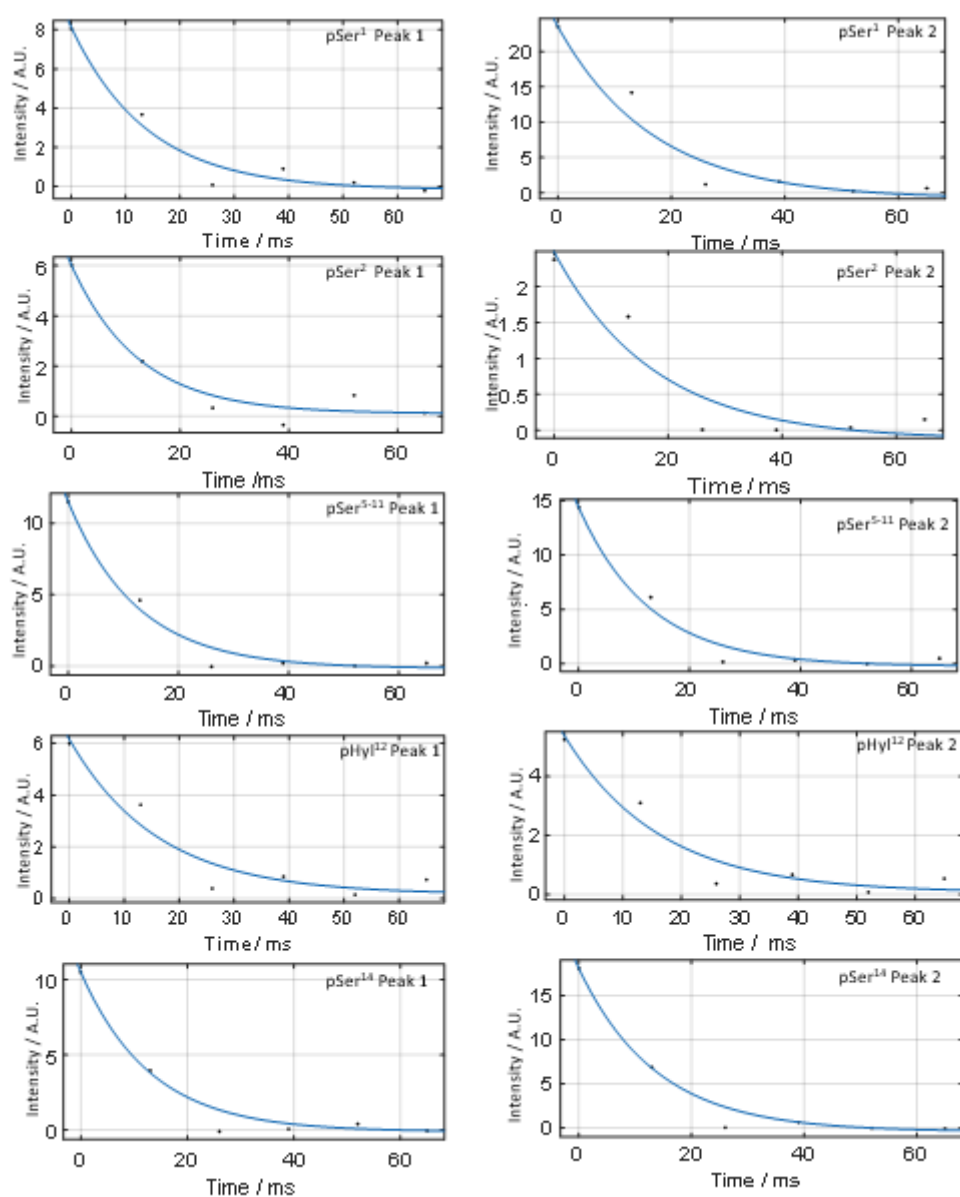

**Fig. S18.**  $^1\text{H}$ - $^{31}\text{P}$   $T_2$  relaxation fits of *synSil-1A<sub>1</sub>* in water.

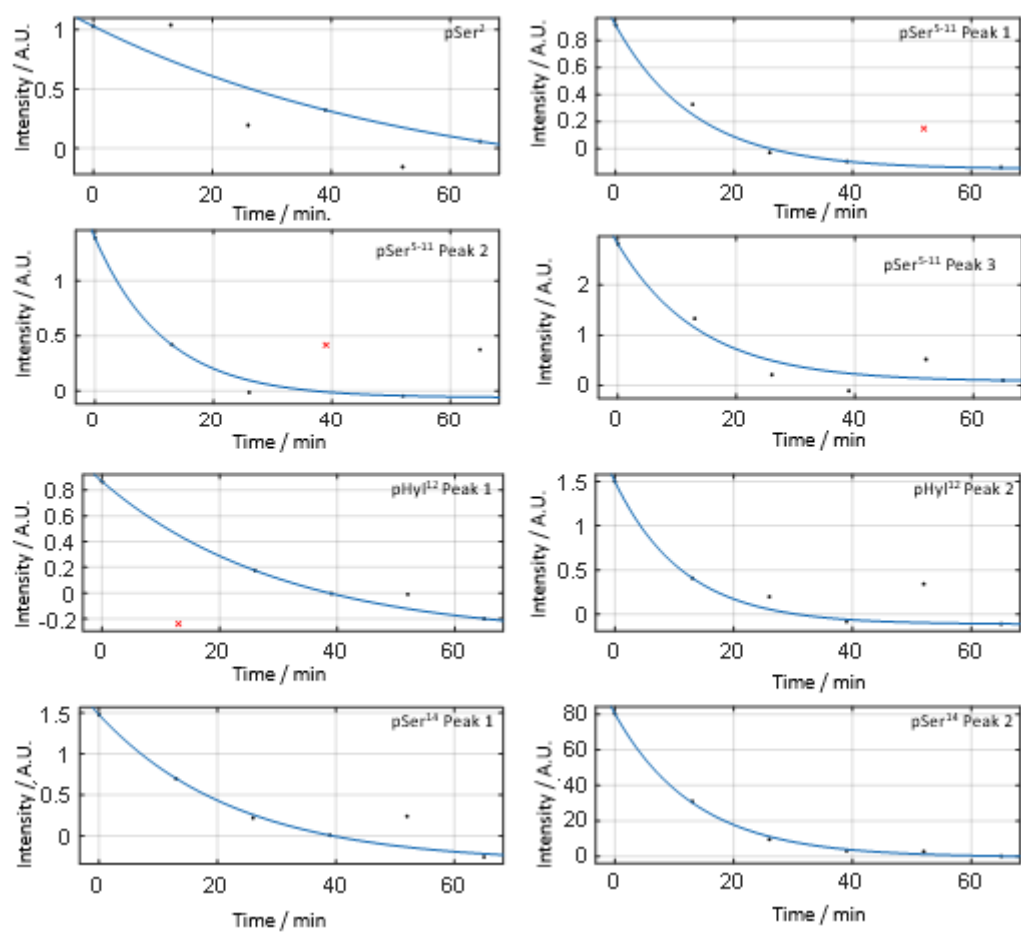

**Fig. S19.**  $^1\text{H}$ - $^{31}\text{P}$   $T_2$  relaxation fits of *synSil-1A<sub>1</sub>* and LCPA (10:1).

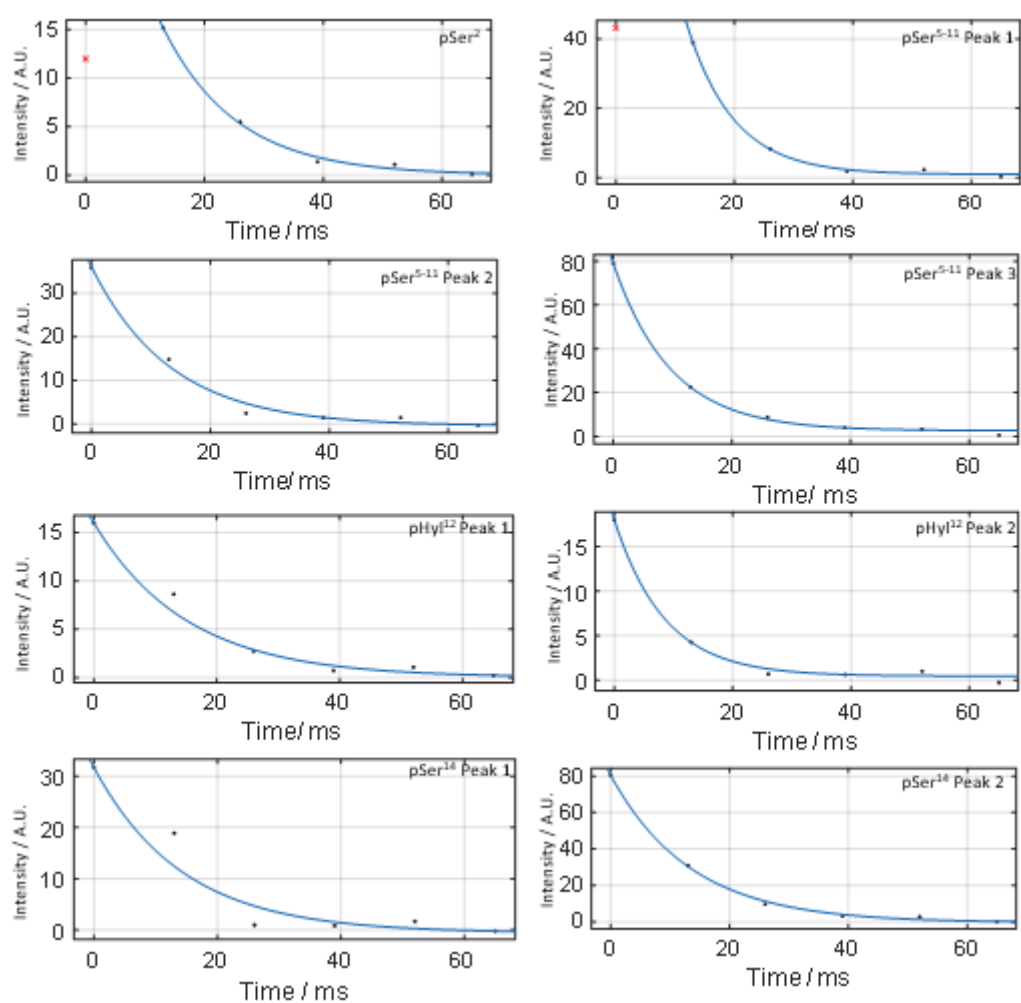

**Fig. S20.**  $^1\text{H}$ - $^{31}\text{P}$   $T_2$  relaxation fits of *synSil-1A<sub>1</sub>* and LCPA (1:1).

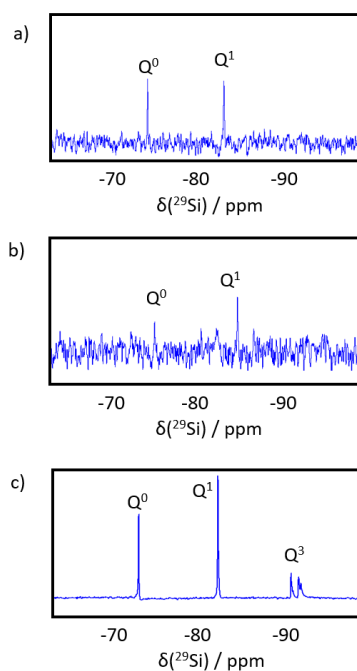

**Figure S21.** Solution-state  $^{29}\text{Si}$  data recorded at different times of the silification process. a) Before the precipitation. Mono silicates and disilicates are visible. b) in the absence of any peptide, the equilibrium shifts towards disilicate within an hour. c) In the presence of R5, the equilibrium shifts to trifold substituted species in solution within a few minutes and then remains stable for hours.

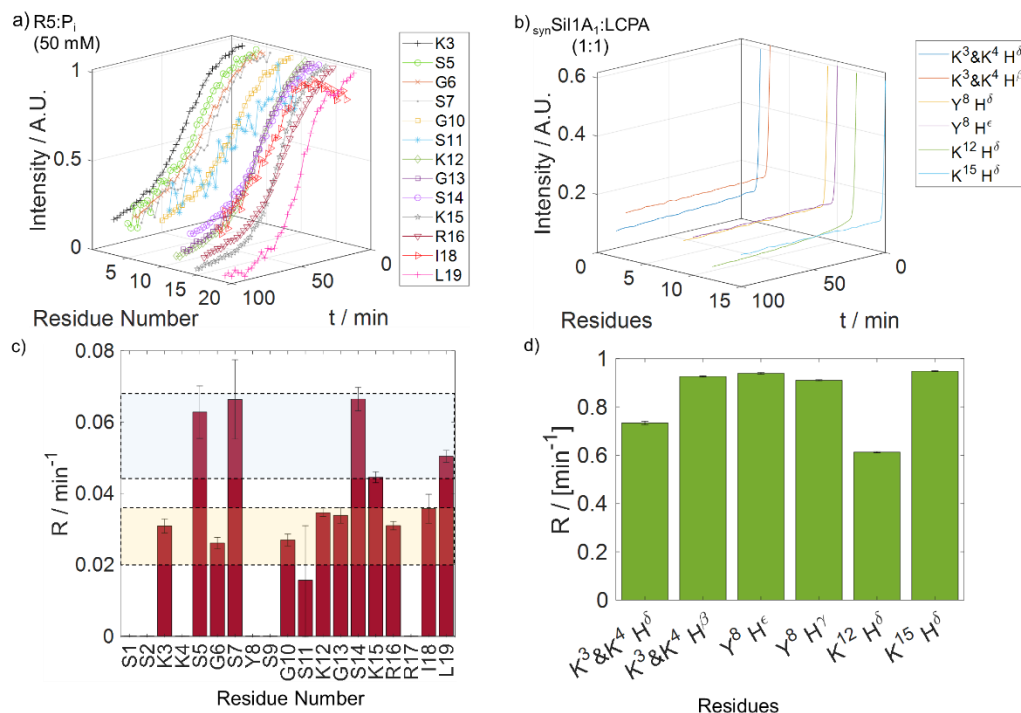

**Fig. S22.** a) Real-time precipitation assay with R5 in 50 mM P<sub>i</sub>, tracing the intensity change in <sup>1</sup>H-<sup>15</sup>N SOFAST HMQC crosspeaks. b) Real time precipitation assay with *syn*Sil-1A<sub>1</sub> : LCPA 1:1 molar ratio, tracing the intensity change in <sup>1</sup>H 1D spectroscopy. c) Per-residue exponential fit of rates for a). d) Sigmoidal fits for rates in different residue types in b). At high counterion ion concentrations of P<sub>i</sub> and LCPA, respectively, the precipitation kinetics were too fast for real-time monitoring by NMR. Only the very slow equilibration of the system subsequent to particle formation is reflected by the data.

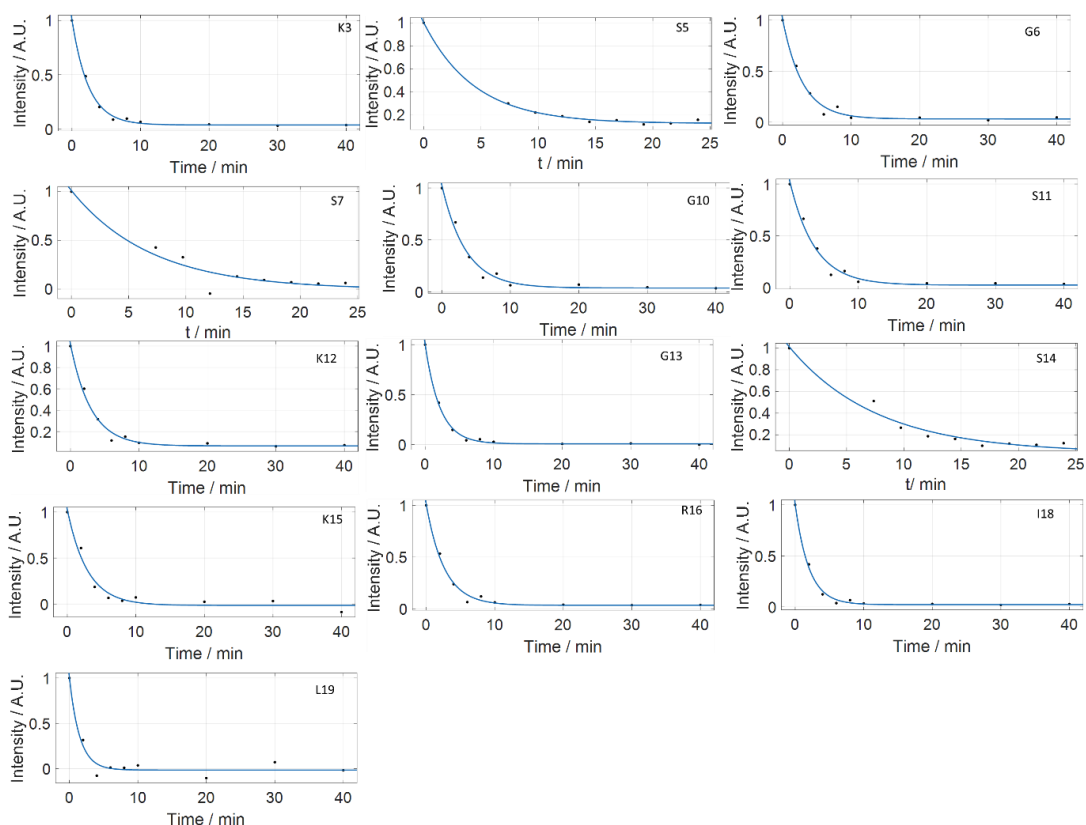

**Fig. S23.** Exponential fits of R5 (11.8 mM Pi) signal intensity decays upon silica formation.

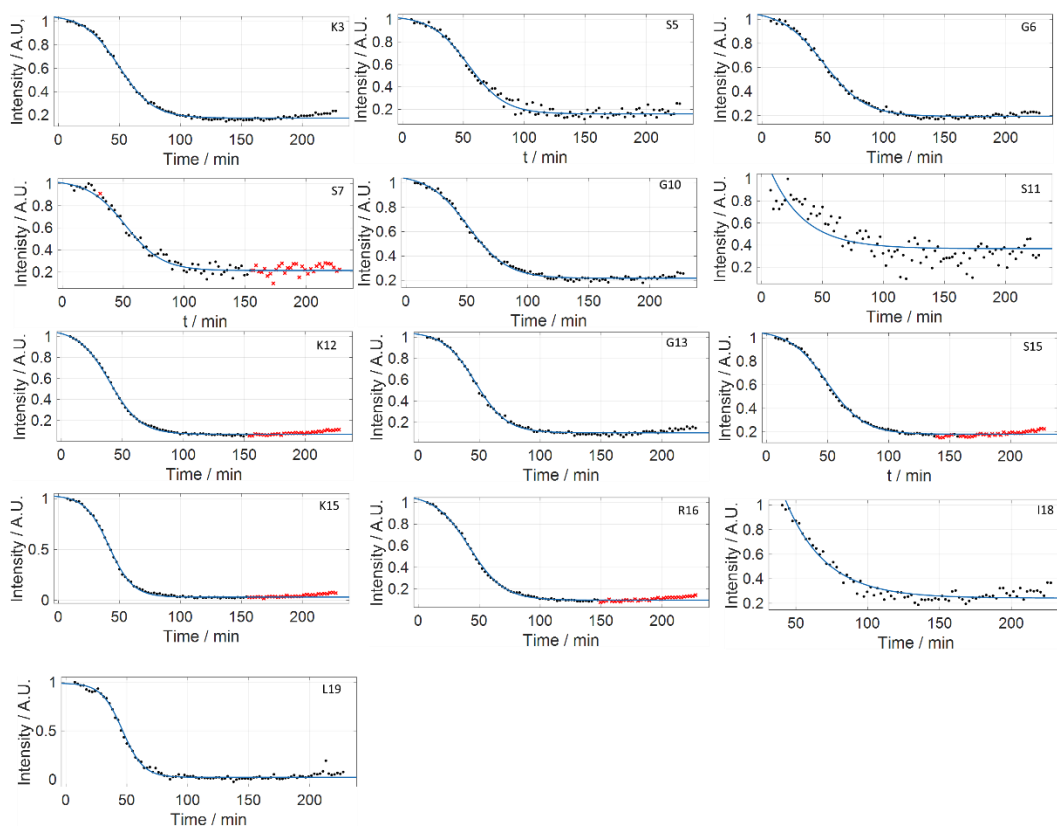

**Fig. S24.** Exponential fits of R5 (50 mM Pi) signal intensity decays upon silica formation.

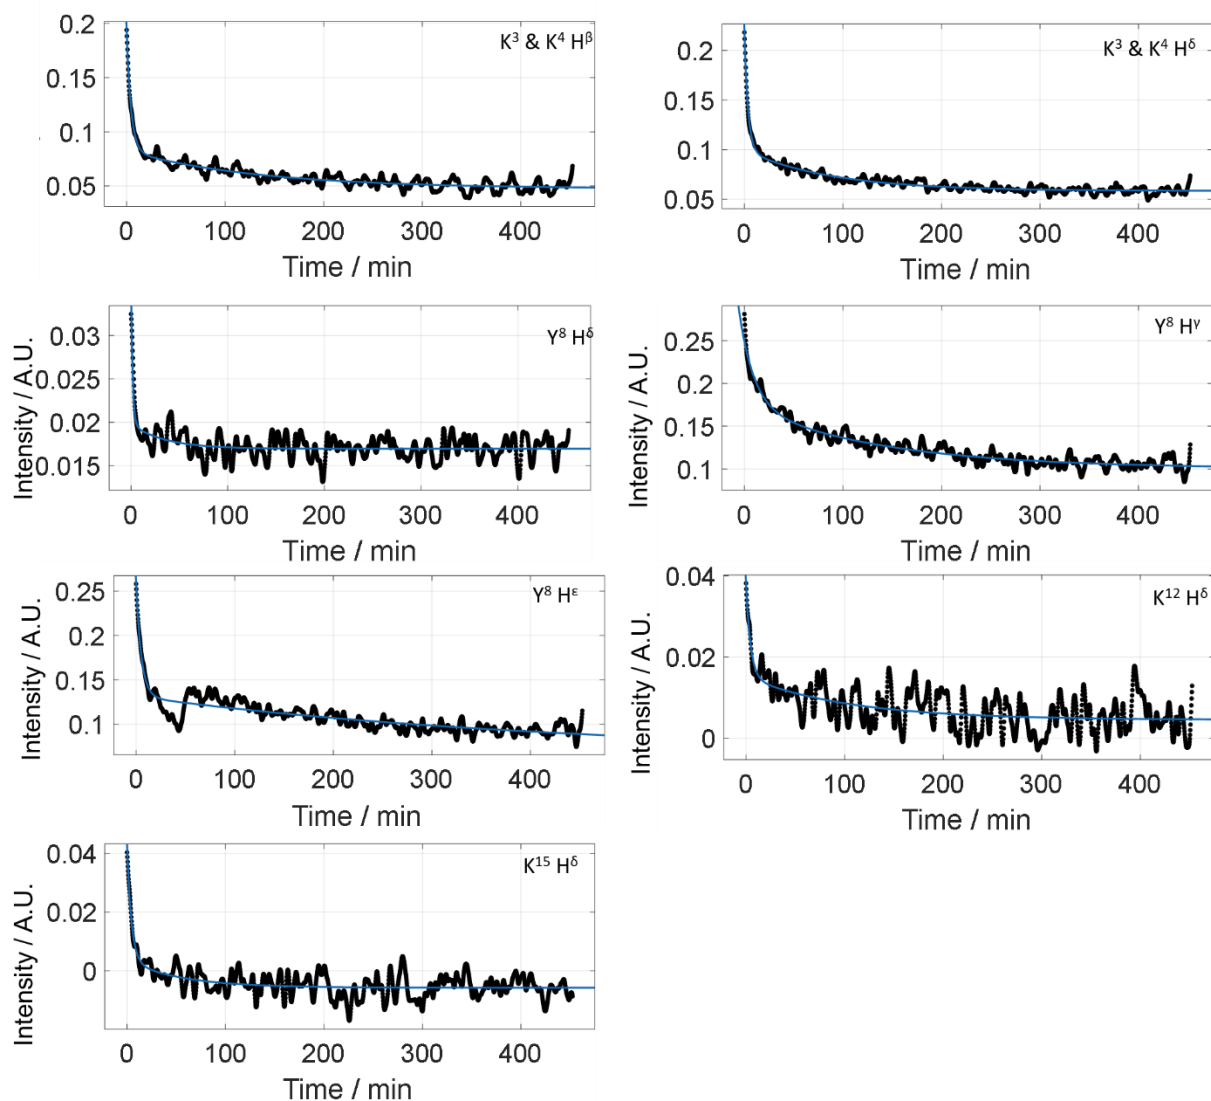

**Fig. S25.** Exponential fits of *synSil-1A<sub>1</sub>*:LCPA 10:1 signal intensity decays upon silica formation.

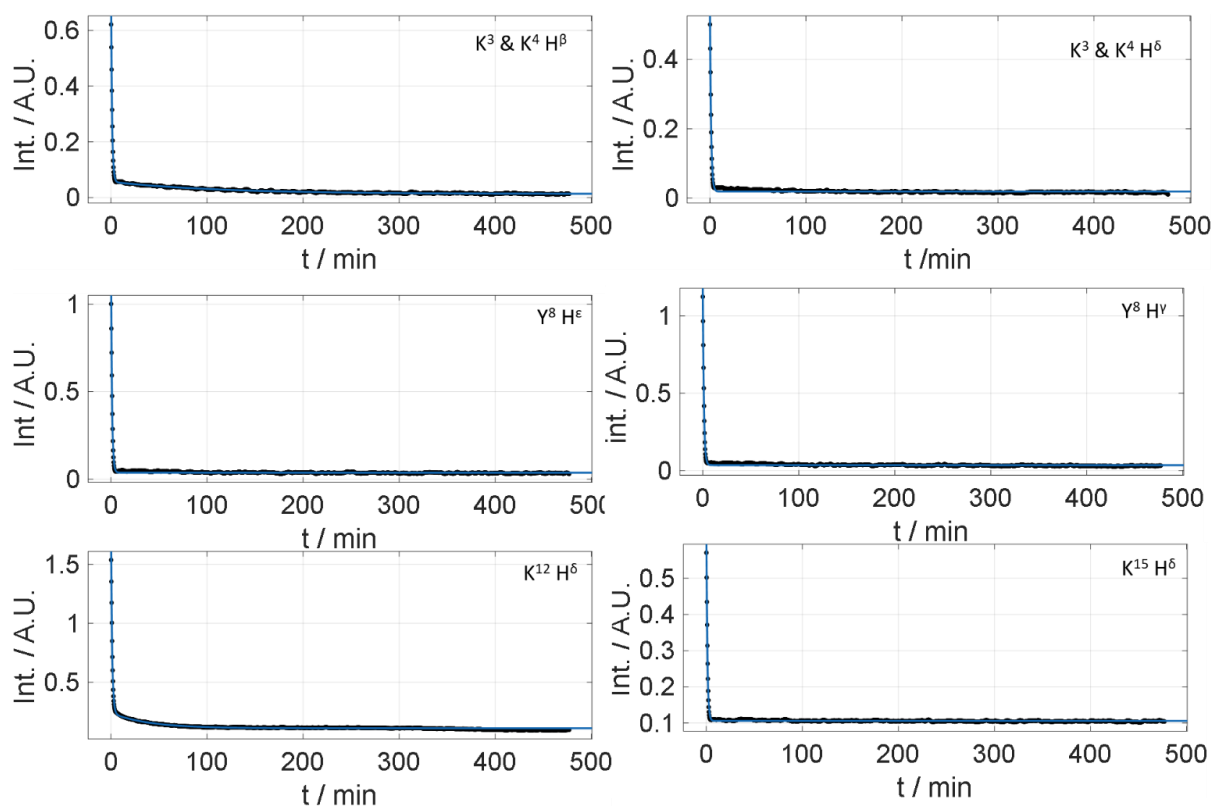

**Fig. S26.** Exponential fits of *synSil-1A<sub>1</sub>*:LCPA 1:1 signal intensity decays upon silica formation.

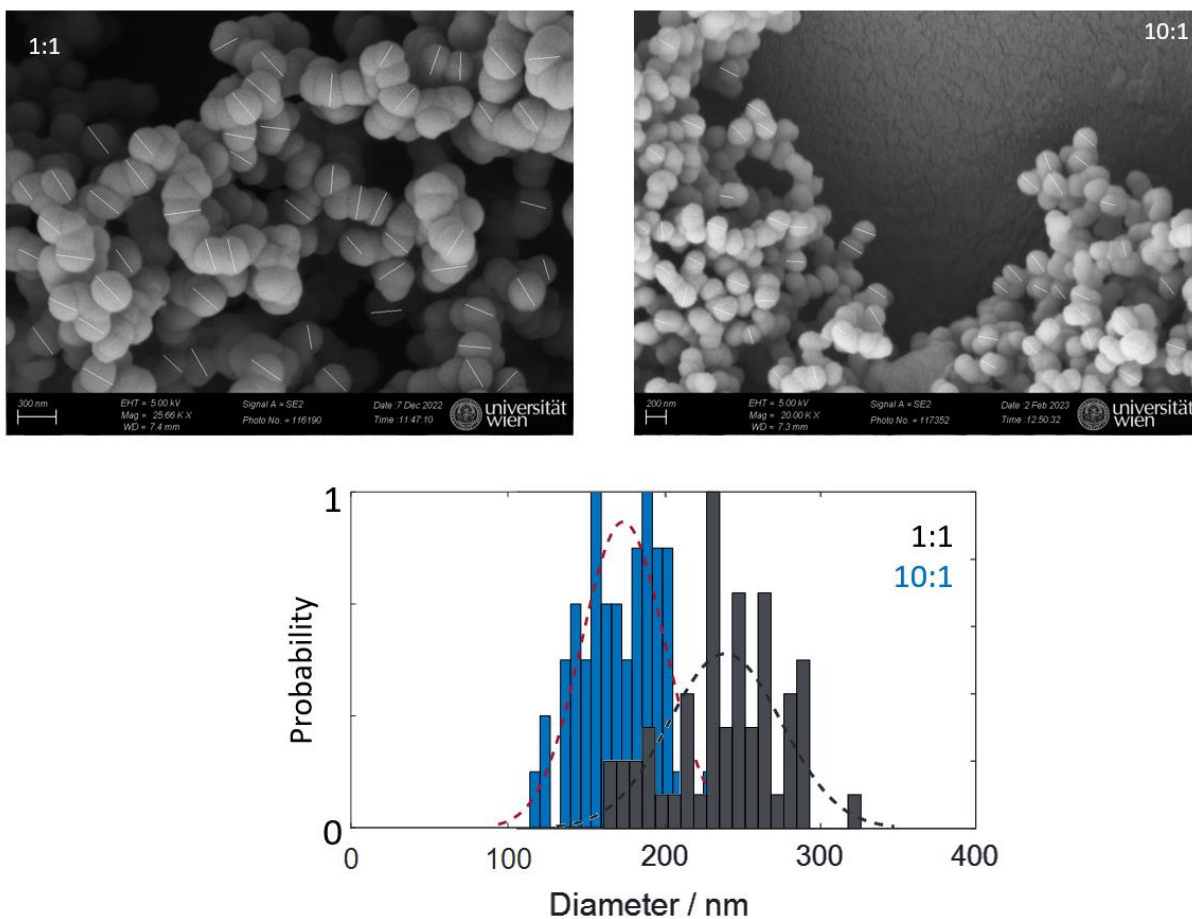

**Figure S27.** Top: *synSil-1A<sub>1</sub>*-templated particles used to evaluate the particle diameters. The white stripes indicate where the diameters have been measured. Bottom: Size distributions and fits to normal distributions. Clearly, the particles grow with increasing LCPA content.

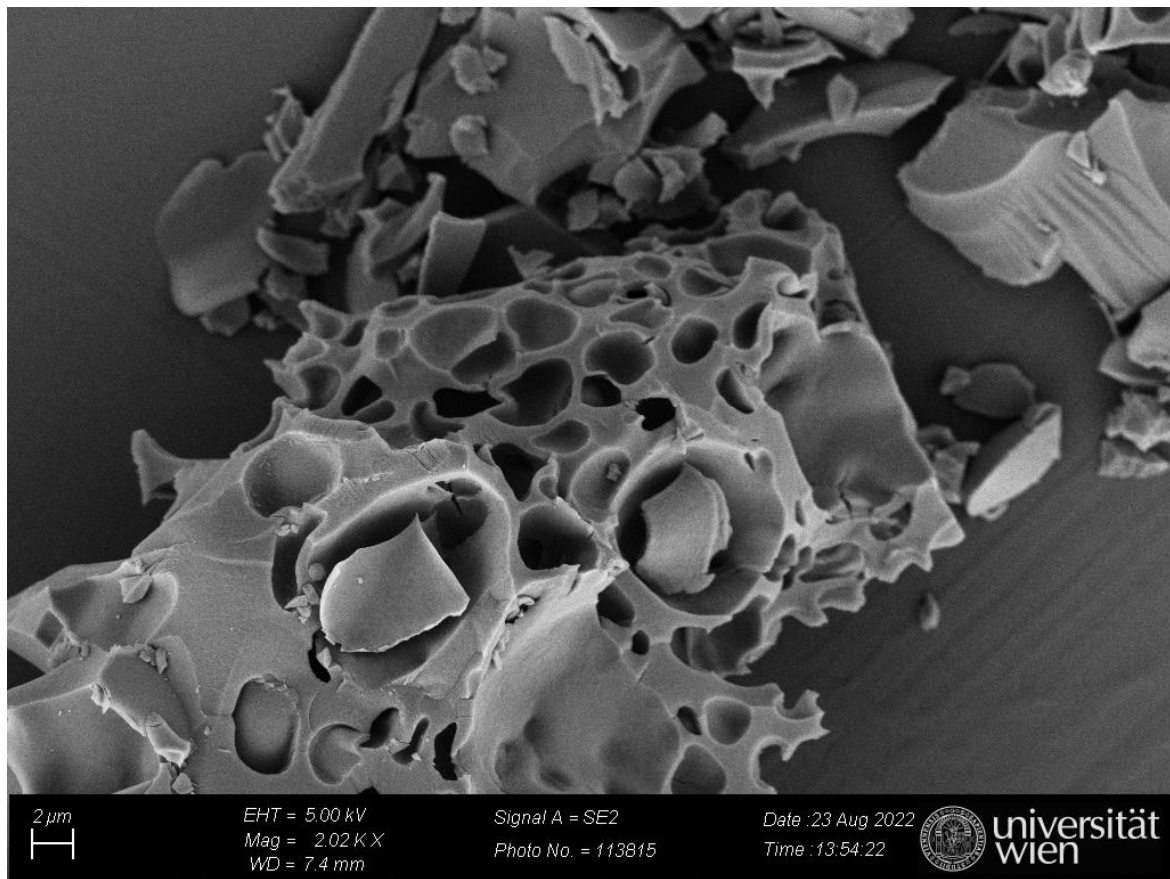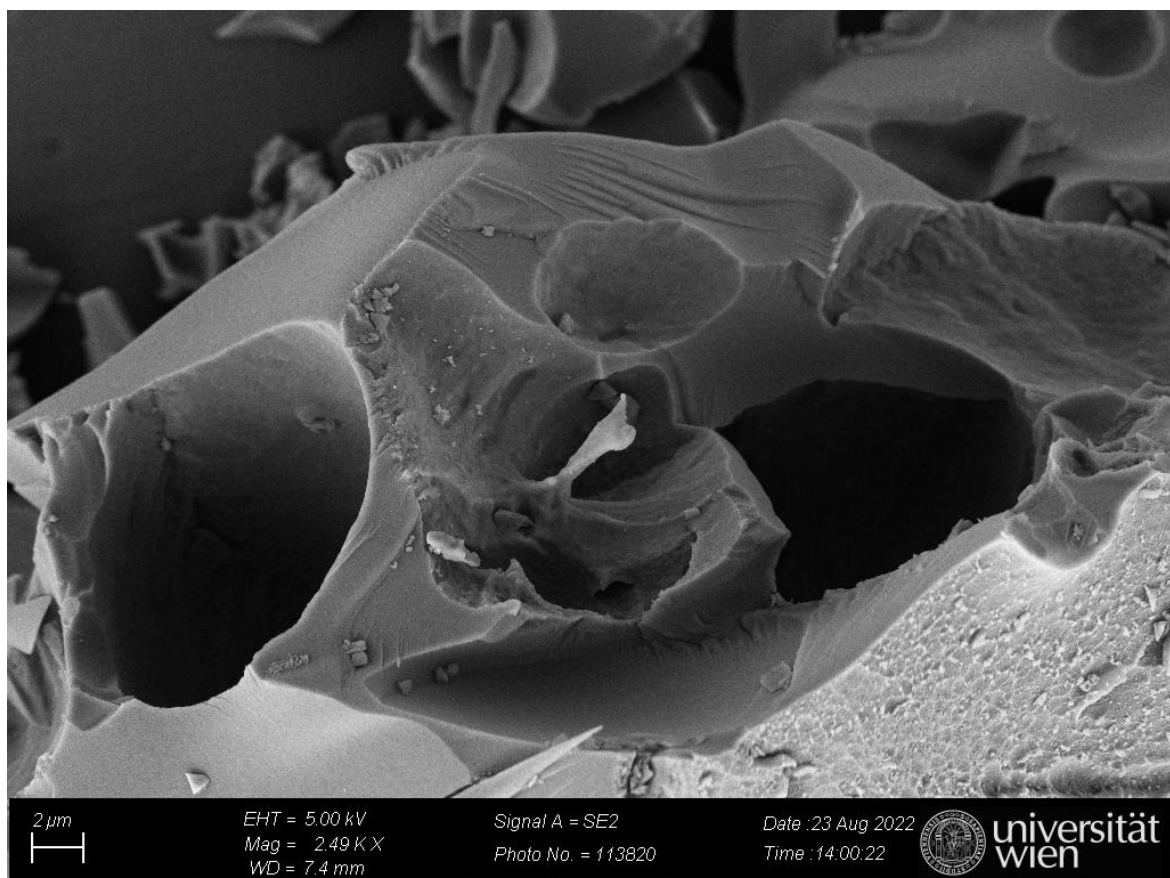

**Fig. S28.** SEM of silica precipitated in the absence of any peptide over a duration of 2 days. No defined structure is observable.

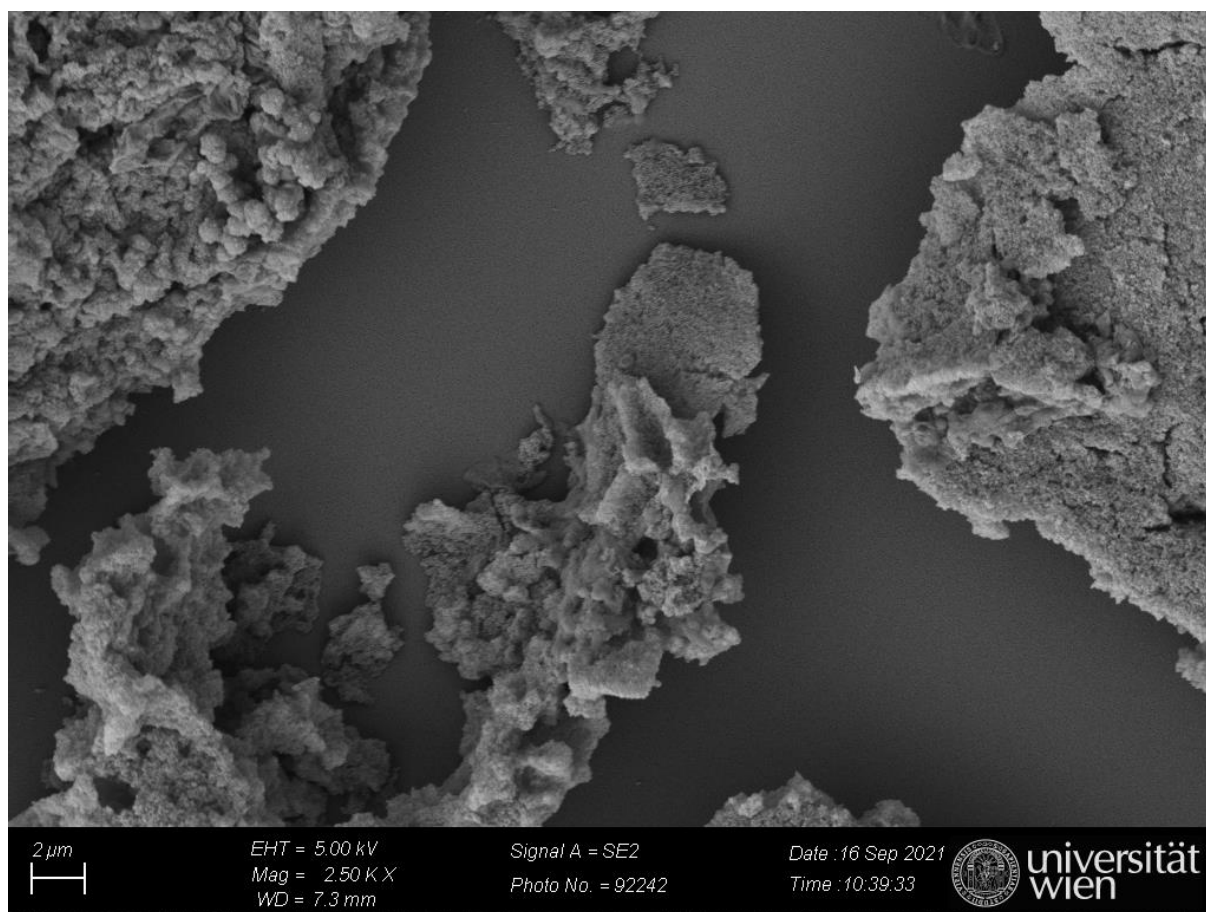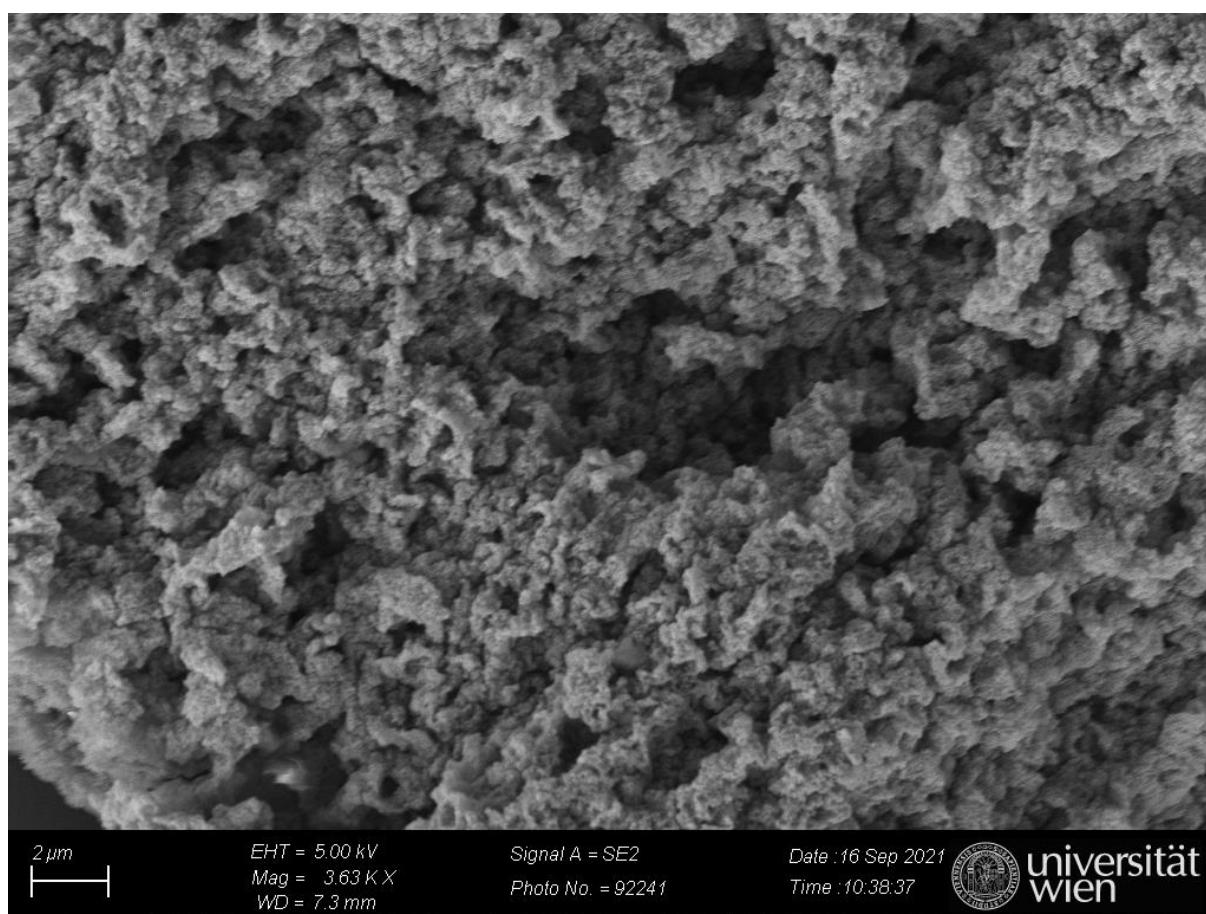

**Fig. S29.** Additional SEM images of silica precipitate templated by R5 (11.8 mM  $\text{P}_i$ ).

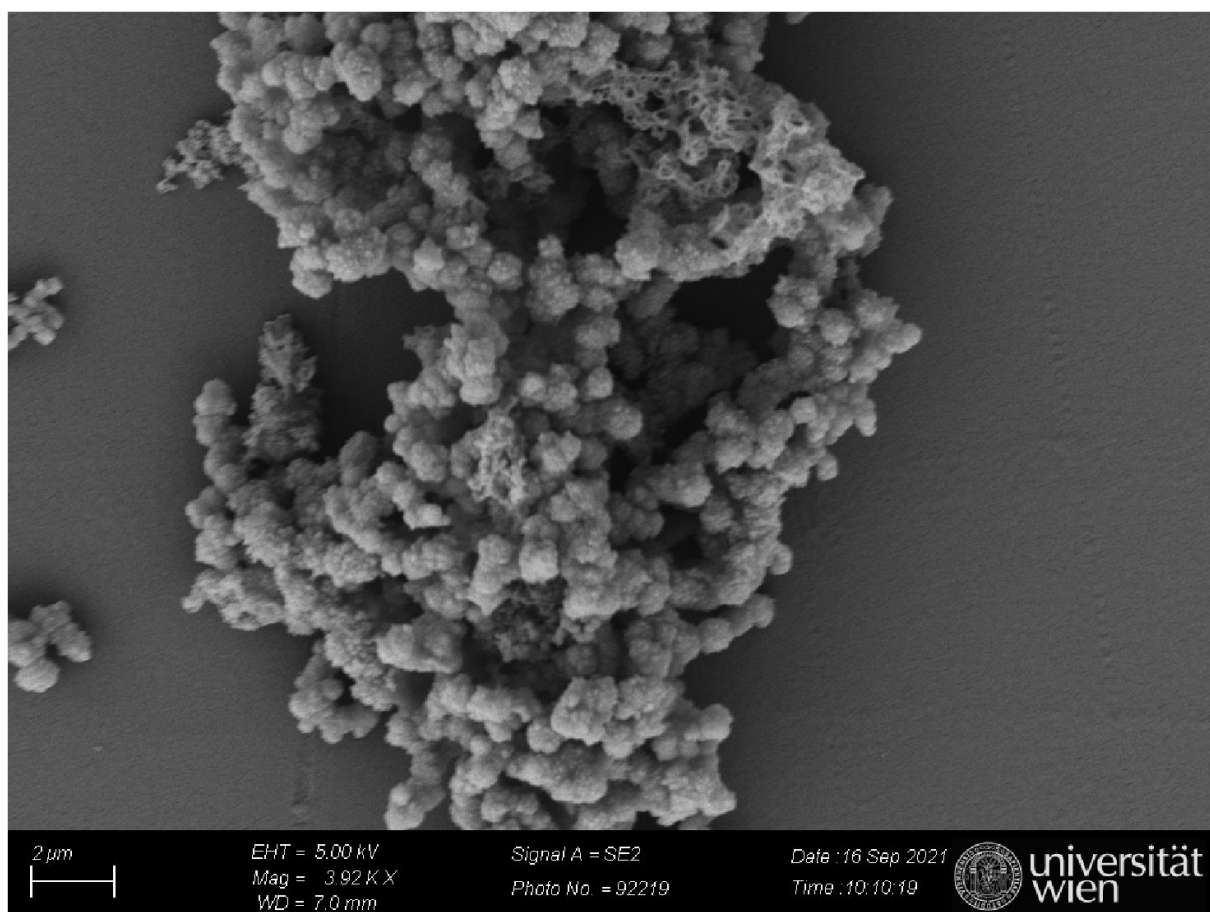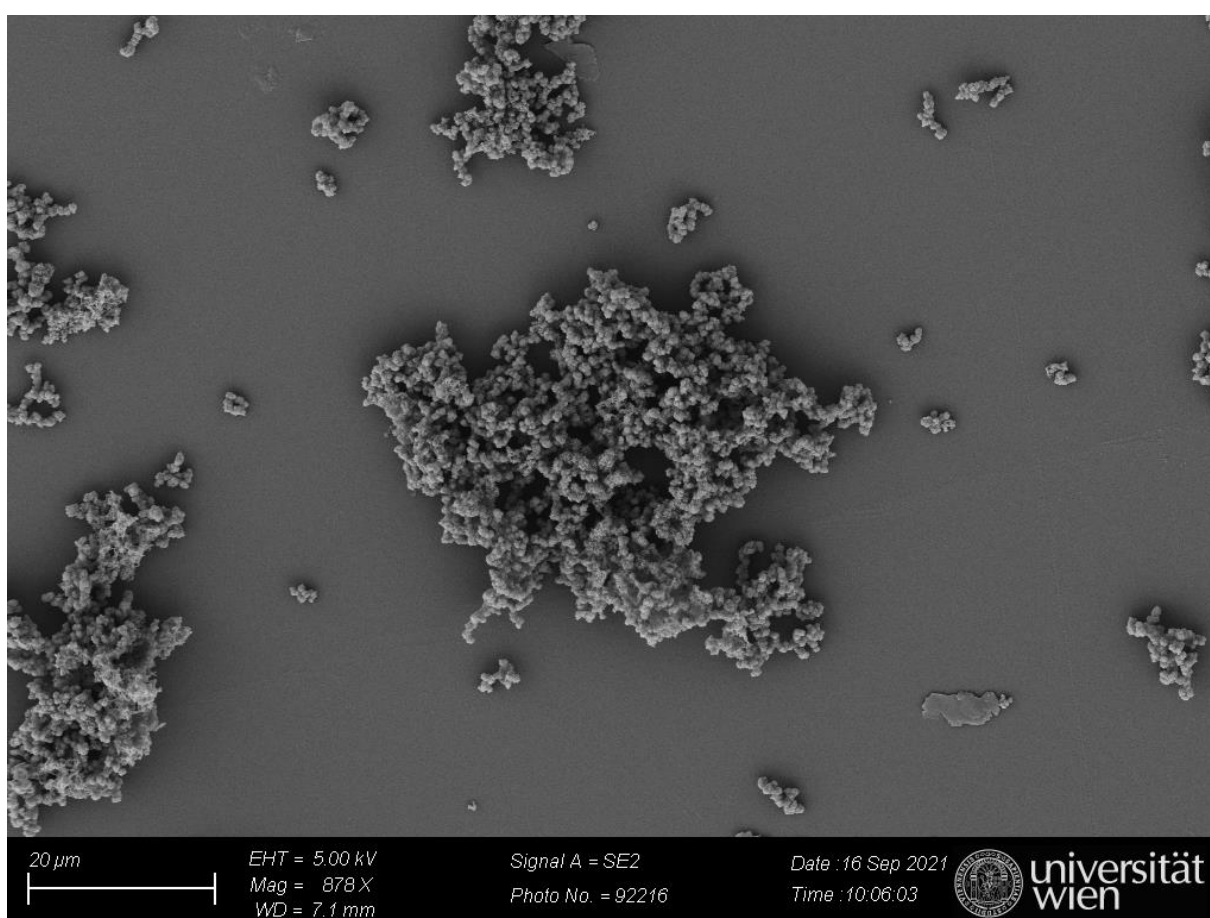

**Fig. S30.** Additional SEM images of silica precipitate templated by R5 (50 mM  $P_i$ ).

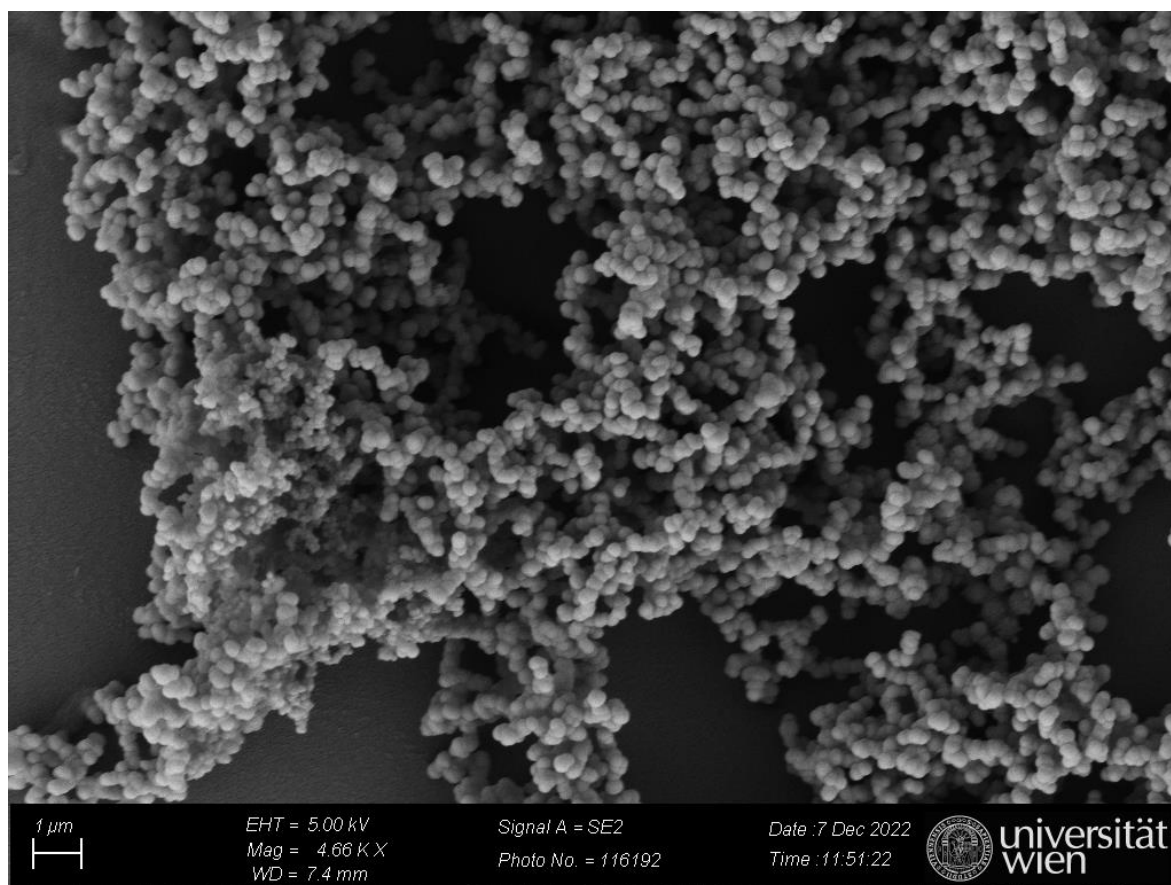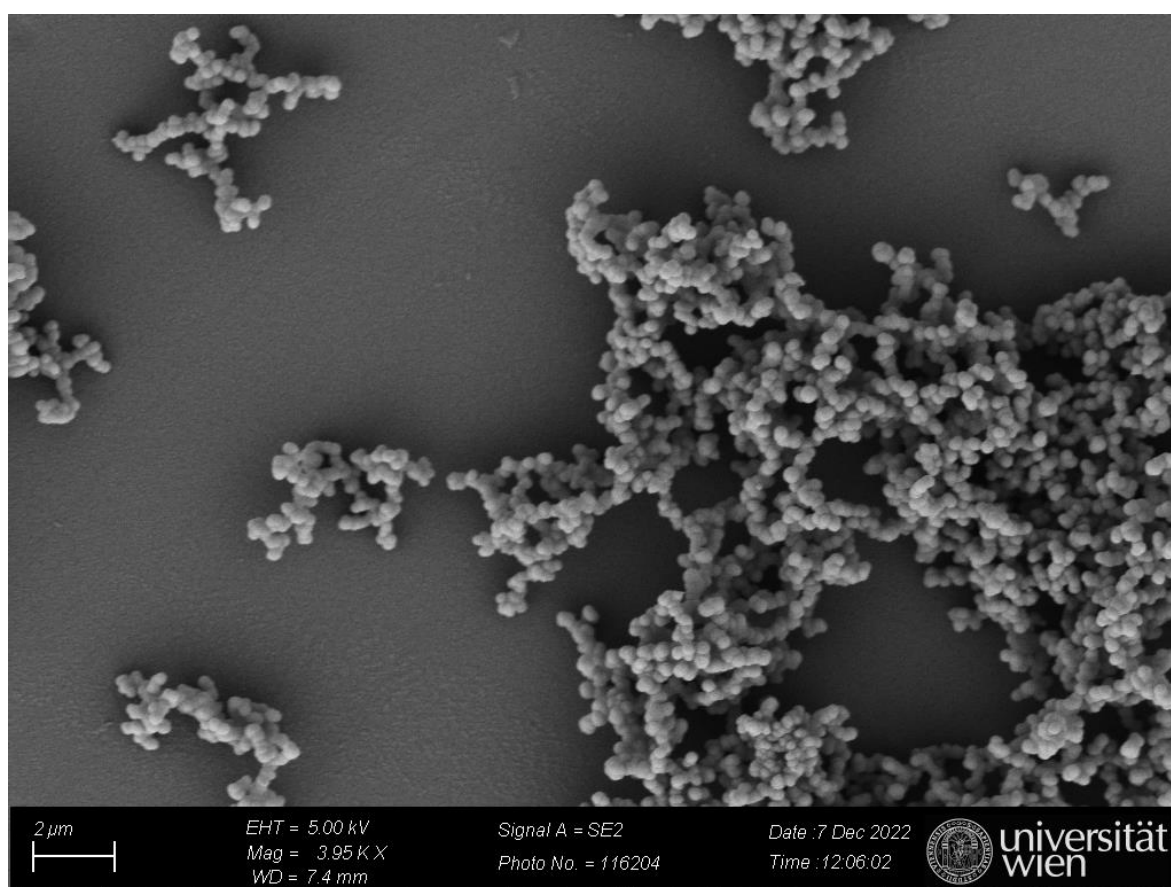

**Fig. S31.** Additional SEM images of silica precipitate templated by *synSil-1A<sub>1</sub>* and LCPA at a molar ratio of 1:1.

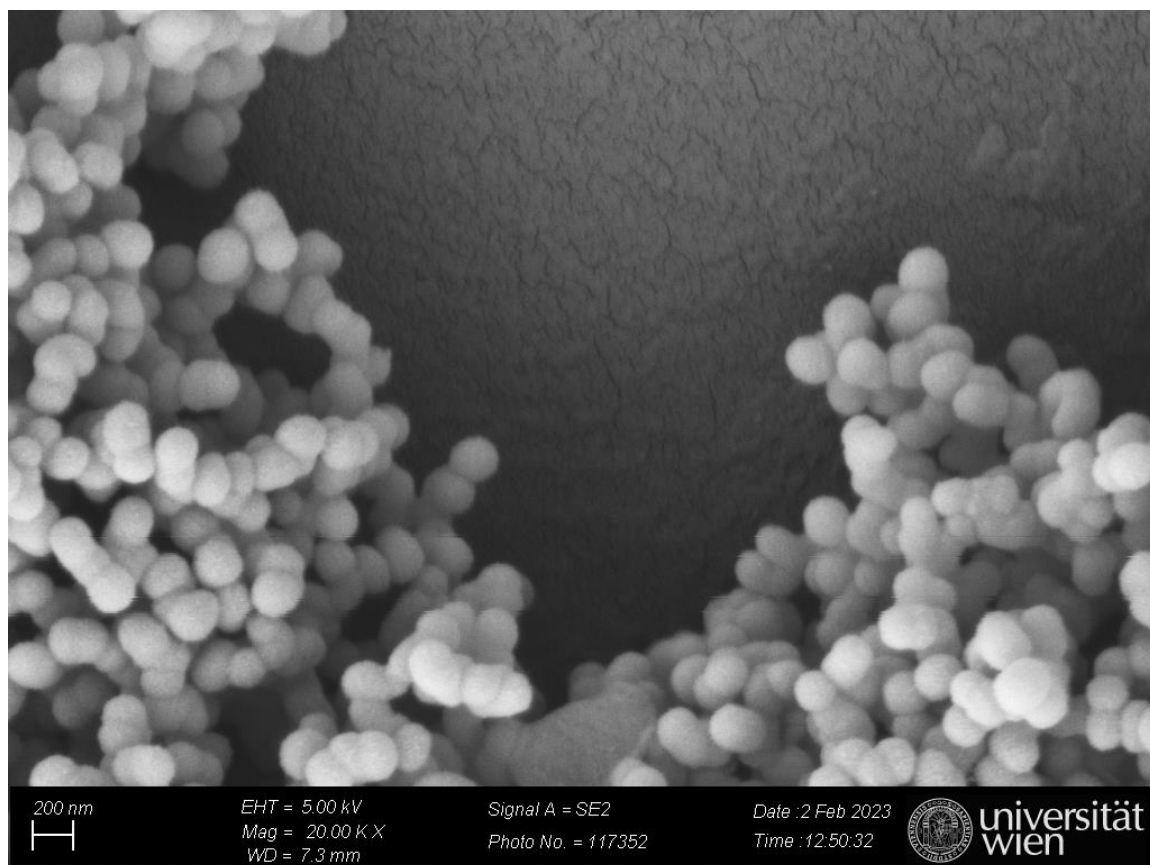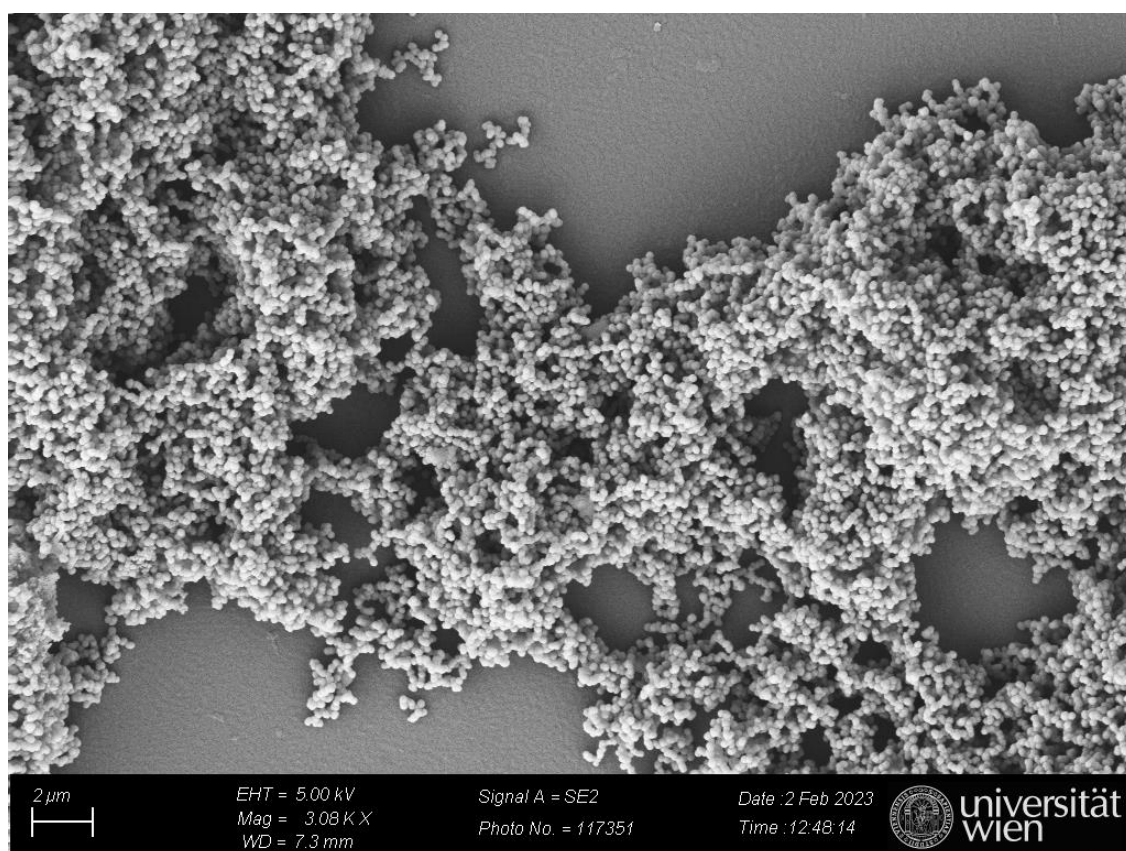

**Fig. S32.** Additional SEM images of silica precipitate by synSil-1A<sub>1</sub> and LCPA at a molar ratio of 10:1.



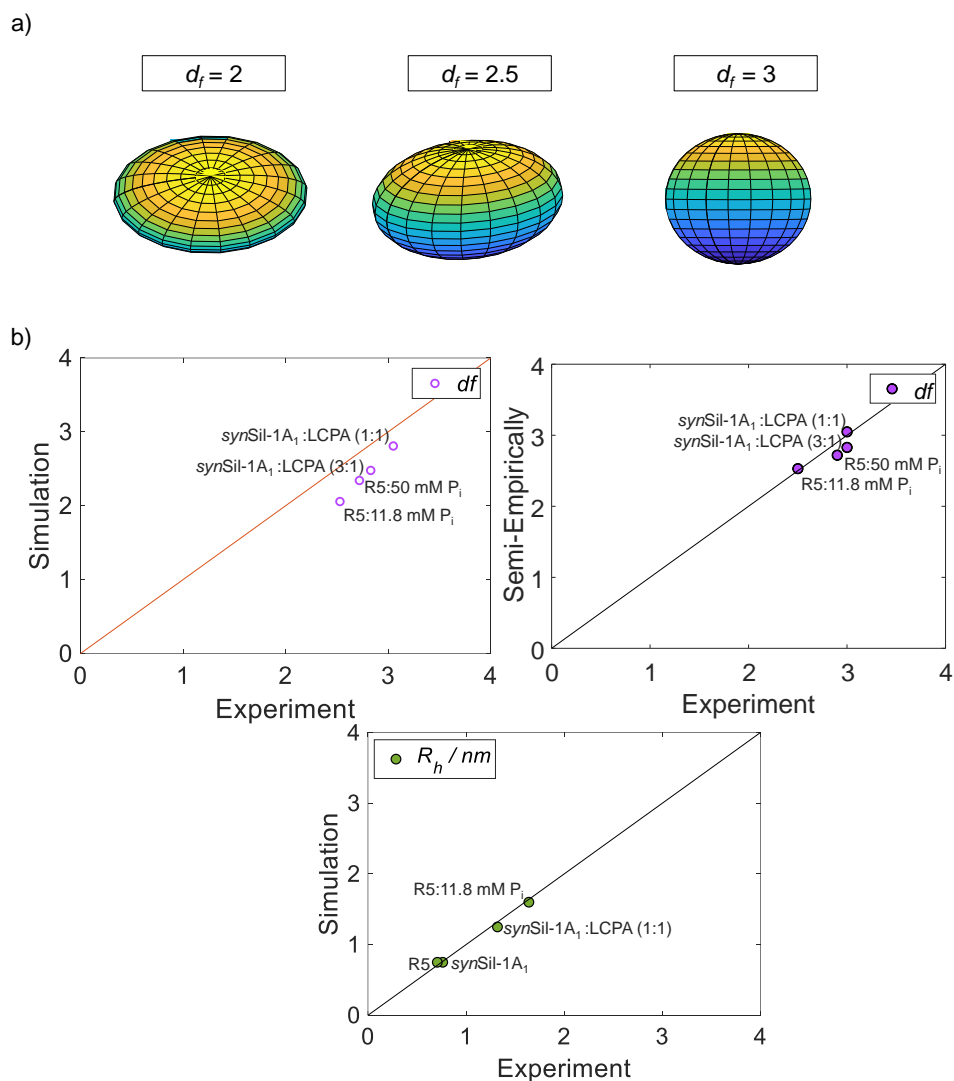

**Fig. S33.** a) Scheme of how different fractal dimension values ( $d_f$ ) represent different structures. Note that this representation is for visualization purposes only and is not an actual representation of the simulated systems. b) Top: Correlation plot for experimental and MD-simulated as well as semi-empirically (rescaled  $R_g$  used from experimental  $R_h$ ) derived fractal dimension ( $d_f$ , purple dots;  $d_f$  is unitless) of the four R5 and synSil-1A<sub>1</sub> self-assemblies. Bottom: Correlation of hydrodynamic radii, rescaled from calculated  $R_g$ , of the peptide trimers from experiments and simulations.

For R5 self-assemblies in solution, a fractal dimension of  $d_f = 2.5$  at low  $P_i$  counterion concentrations has been determined in earlier studies<sup>4</sup>, indicating a somewhat planar morphology (the limiting case of  $d_f = 2$  would correspond to a 2D object,  $d_f = 3$  to spherical objects)<sup>5</sup>. Well-aligning with these observations, the silica coating of our R5 self-assemblies under these conditions led to silica plates with an identical fractal dimension of  $2 < d_f < 3$  upon silica co-precipitation (Fig. 8a-b). In contrast, at high counterion concentrations, a self-assemblies  $d_f$  of  $\sim 3$  was observed earlier.<sup>4</sup> Accordingly, these assemblies led to spherical silica

particles in our SEM experiments, again with a  $d_f$  similar to that of the self-assemblies (Fig 8a-d). Hence, the fractal dimension of the self-assemblies seems to predetermine the fractal dimension, *i.e.*, the structure of the solid silica particles. For *synSil-1A<sub>1</sub>*, we found  $d_f = 3$  for both probed counterion concentrations, *i.e.*, spherical particles appeared in both cases. However, different particle sizes were found for the two different conditions in agreement with earlier reports<sup>6</sup>. Hence, while the fractality of the self-assemblies predetermines the shape of the silica particles for R5, the size of the self-assemblies governs the size of the final particles for *synSil-1A<sub>1</sub>*.

To validate this finding, the experimental fractal dimensions were compared with those obtained by our MD simulations. To determine  $d_f$ , we employed the method described by Polyansky *et al.* in reference<sup>7,8</sup>. We used Eqs. 1-13 reported therein<sup>7,8</sup> for our calculations. All values used for the calculations are shown in Table S2. For R5, we found a fractal dimension  $d_f = 2.53$  at low concentrations, which increased to 2.72 upon increasing the  $P_i$  concentration. Hence, the particle dimensionality observed in the electron micrographs, as well in the reported literature for the peptide self-assemblies before coating, correlated well with the simulations. Similar good matches were found for *synSil-1A<sub>1</sub>*. While  $d_f = 2.83$  was found at low LCPA concentrations, 3.05 was computed for high LCPA concentrations (calculated by rescaled  $R_g$  from experimentally derived  $R_h$ ). Fig. S33 shows the correlation between simulated and experimentally determined hydrodynamic radii of the tripeptide subunits and the fractal dimension of all studied self-assemblies. Overall, the match corroborates the simulated structures.

The slight underestimation of peptide compactness in simulations (Fig. S33) might be related to the difference in compactness estimation suggested in Polyansky *et al.*<sup>7,8</sup> Herein, the assemblies are constituted by timer-building blocks with a different  $R_g$  as compared to individual peptides.

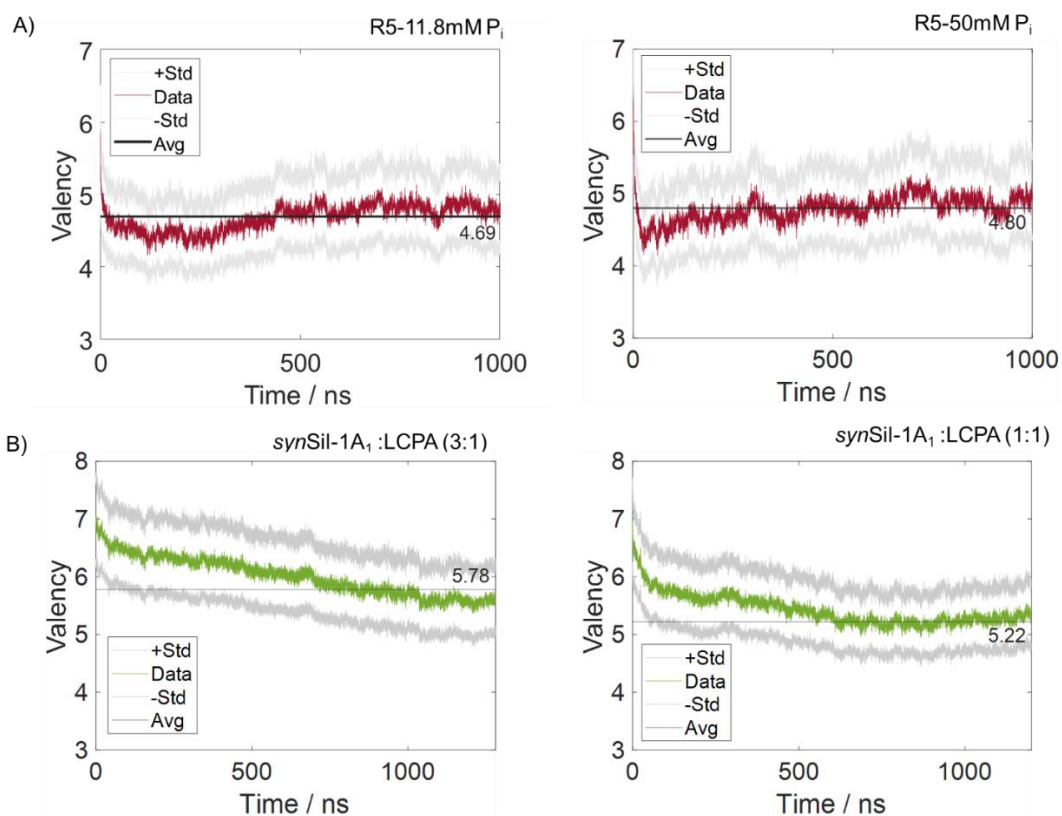

**Fig. S34.** Time traces of interaction valency in crowded-state simulations for different systems. A) R5 in 11.8 mM  $P_i$  (left) and R5 in 50 mM  $P_i$  (right). B) *synSil-1A1*:LCPA (3:1) (left) and *synSil-1A1*:LCPA (1:1) (right).

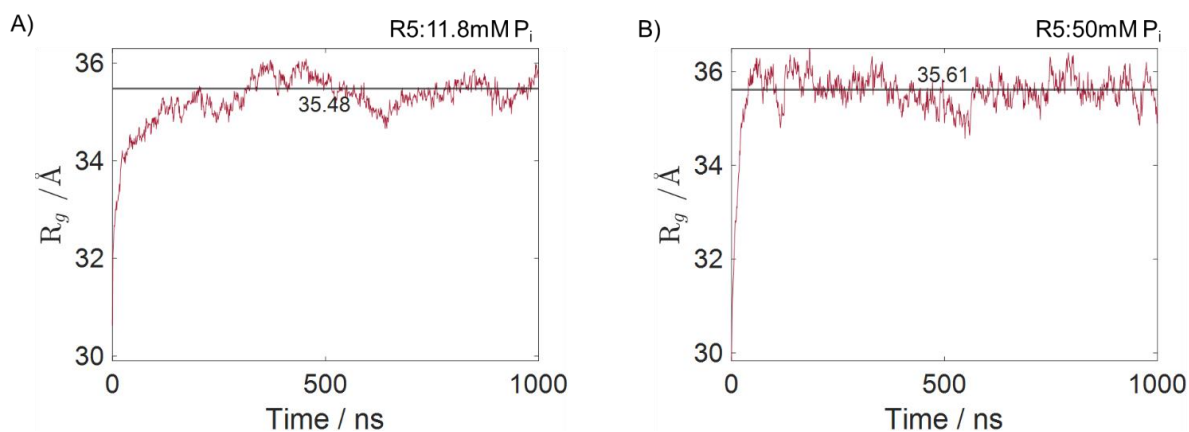

**Fig. S35.** Time traces of the overall radius of gyration for the simulated assemblies of R5 with (A) 11.8 mM  $P_i$  and (B) 50 mM  $P_i$  (B). Average over 25 R5 units.

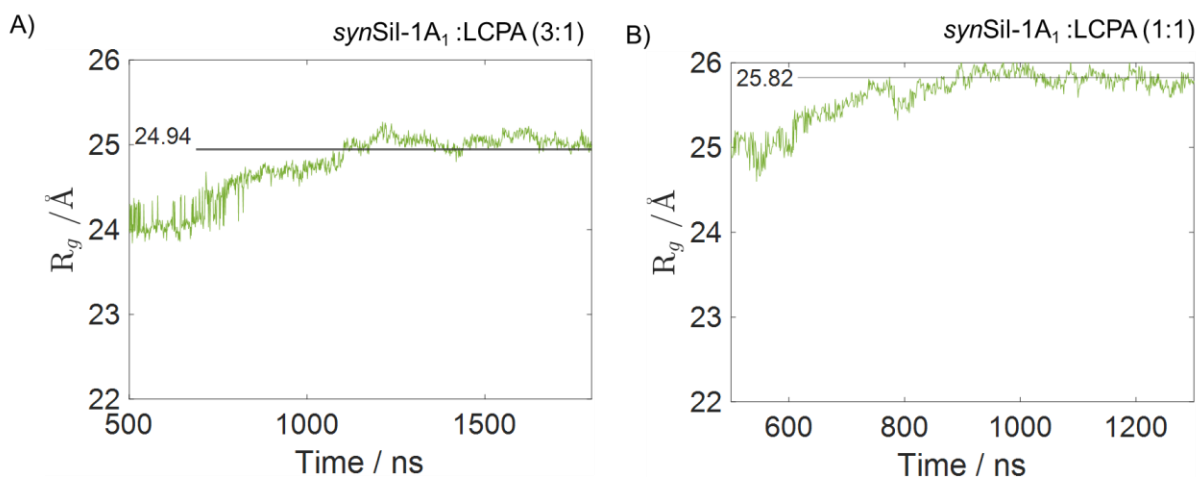

**Fig. S36.** Time traces of the overall radius of gyration for the simulated assemblies of 25 *synSil-1A<sub>1</sub>* units with different concentrations of LCPA for (A) *synSil-1A<sub>1</sub>*:LCPA (3:1) and (B) *synSil-1A<sub>1</sub>*:LCPA (1:1), Average over all 25 units.

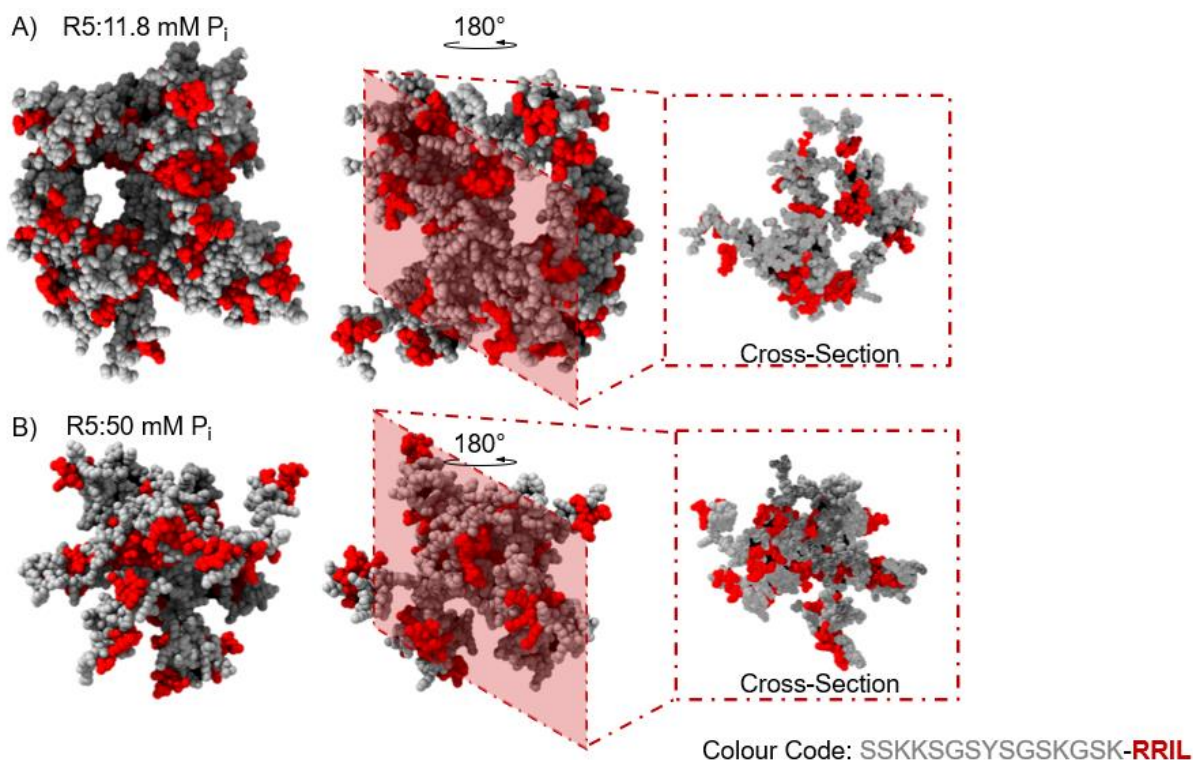

**Fig. S37.** Many of the RRIL motifs are located at the surface, which is also in line with our earlier observation showing that the RRIL motif is involved in silica scavenging<sup>9</sup>. However, some of these motifs are buried within the structure, likely providing stability to the self-assemblies.

## Further Tabulated Data

**Table S1.** NMR resonance assignments for  $^{13}\text{C}$  and  $^{15}\text{N}$  labeled R5. The assignment was achieved by combining HNCACB, HNN, and HSQC spectra.

|     | $^{13}\text{C-C}\alpha$<br>[ppm] | $^{13}\text{C-C}\beta$<br>[ppm] | $^{15}\text{N}$<br>[ppm] | $^1\text{H}$ [ppm] |
|-----|----------------------------------|---------------------------------|--------------------------|--------------------|
| S2  | 58.305                           | 63.76                           | 117.024                  | 8.295              |
| K3  | 57.308                           | 38.852                          | 119.849                  | 7.166              |
| K4  | 56.737                           | 33.039                          | 119.889                  | 7.203              |
| S5  | 59.538                           | 64.178                          | 117.818                  | 8.396              |
| G6  | 45.503                           | -                               | 110.941                  | 8.459              |
| S7  | 58.38                            | 63.998                          | 115.608                  | 8.189              |
| Y8  | 61.018                           | 38.192                          | 122.759                  | 8.327              |
| S9  | 58.268                           | 63.895                          | 118.777                  | 8.299              |
| G10 | 45.498                           | -                               | 110.433                  | 7.822              |
| S11 | 58.504                           | 64.153                          | 115.57                   | 8.227              |
| K12 | 57.084                           | 33.306                          | 123.641                  | 8.419              |
| G13 | 45.475                           | -                               | 109.831                  | 8.397              |
| S14 | 58.299                           | 63.767                          | 115.621                  | 8.164              |
| K15 | 56.124                           | 31.011                          | 123.335                  | 8.379              |
| R16 | 56.296                           | 31.173                          | 122.629                  | 8.275              |
| R17 | 57.1                             | 32.612                          | 123.576                  | 8.469              |
| I18 | 56.47                            | 32.945                          | 123.918                  | 8.267              |
| L19 | 56.555                           | 42.874                          | 130.808                  | 8.056              |

**Table S2.** Overview of parameters extracted from MD simulations to compute the peptide structures and trimer structures:

| Simulated System                           | Number of Peptides | Number of Water Atoms | Na <sup>+</sup> | Cl <sup>-</sup> | Box size [Å] | Simulation length [ns] |
|--------------------------------------------|--------------------|-----------------------|-----------------|-----------------|--------------|------------------------|
| R5 neat                                    | 1                  | 3265                  | 6               | 12              | 46.50        | 700                    |
| R5: Pi (11.8 mM)                           | 1                  | 8508                  | 20              | 27              | 63.70        | 1097.20                |
| R5: Pi (50 mM)                             | 1                  | 894                   | -               | 17              | 31.50        | 1932.40                |
| 4R5: Pi (11.8 mM)                          | 4                  | 8324                  | 6               | 34              | 63.86        | 774.60                 |
| 4R5: Pi (50 mM)                            | 4                  | 8149                  | 6               | 34              | 63.60        | 2430.60                |
| <i>synSil</i> -1A <sub>1</sub>             | 1                  | 2484                  | 1               | -               | 42.55        | 784.30                 |
| <i>synSil</i> -1A <sub>1</sub> :LCPA (3:1) | 1                  | 1770                  | 12              | 4               | 39.42        | 715.50                 |
| <i>synSil</i> -1A <sub>1</sub> :LCPA (1:1) | 1                  | 3762                  | 4               | 1               | 48.7         | 952                    |
| <i>synSil</i> -1A <sub>1</sub> :LCPA (3:3) | 3                  | 6886                  | 23              | 24              | 59.93        | 763                    |

**Table S3.** Overview for parameters extracted from MD simulations to compute the objects' fractal dimensions see Methods, Valency was determined by monomer:

| Simulated System                           | Number of Peptides | Number of Water Atoms | Na <sup>+</sup> | Cl <sup>-</sup> | Box size [Å] | Simulation length [ns] | Density [g/cm <sup>3</sup> ] | Valency     |
|--------------------------------------------|--------------------|-----------------------|-----------------|-----------------|--------------|------------------------|------------------------------|-------------|
| R5: Pi (11.8 mM)                           | 25                 | 8879                  | 2               | 432             | 72.6         | 1090.50                | 0.6100                       | 4.81 ± 0.18 |
| R5: Pi (50 mM)                             | 25                 | 7266                  | -               | 425             | 71.5         | 1092.80                | 0.6194                       | 4.92 ± 0.18 |
| <i>synSil-1A</i> <sub>1</sub> : LCPA (3:1) | 25                 | 2897                  | 5               | 5               | 52.0         | 1008.20                | 0.8899                       | 5.57 ± 0.33 |
| <i>synSil-1A</i> <sub>1</sub> : LCPA (1:1) | 25                 | 2326                  | 5               | 5               | 57.0         | 1305.60                | 0.9754                       | 5.22 ± 0.28 |

## **Bruker TopSpin 4 Pulse program for $^1\text{H}$ - $^{31}\text{P}$ CPMG-HSQC**

```
;na_hsqcetf3gpxy.go adapting for 2-channels from Bruker seq. na_hsqcetf3gpxy
;avance-version (12/01/11)
;HSQC
;2D H-1/P-31 correlation
; using XY16-CPMG for transfer
;phase sensitive using Echo/Antiecho-TPPI
;using f3 - channel
;(use parameterset NA_HSQCETF3GPXY)
;
;B. Luy & J.P. Marino, J. Am. Chem. Soc. 123, 11306-11307 (2001)
;(F.A.A. Mulder, C.A.E.M. Spronk, M. Slijper, R. Kaptein &
; R. Boelens, J. Biomol. NMR 8, 223-228 (1996))
;(Davis et al., J. Magn. Reson. 98, 207 - (1992))
;
;$CLASS=HighRes
;$DIM=2D
;$TYPE=
;$SUBTYPE=
;$COMMENT=
prosol relations=<triple_na>
#include <Avance.incl>
#include <Grad.incl>
#include <Delay.incl>
"p2=p1*2"
"p22=p21*2"
"d11=30m"
"d26=1s/(cnst4*4)"
"d0=3u"
"in0=inf1/2"
"DELTA1=p16+d16+4u"
"COUNTER=d26*2/((d21*2+larger(p2,p22))*16)"
"l4=COUNTER*16"
"d31=(d21*2+larger(p2,p22))*l4"
```

1 ze

d11 pl16:f2

2 d1 do:f2

3 50u pl3:f2 UNBLKGRAD

20u rpp6

20u rpp16

(p1 ph1)

4 d21

(center (p2 ph6) (p22 ph16):f2 )

d21 ipp6 ipp16

lo to 4 times l4

(p1 ph2)

4u

p16:gp1

d16

(p21 ph3):f2

d0

(p2 ph5)

d0

p16:gp2\*EA

d16

(p22 ph4):f2

DELTA

(ralign (p1 ph1) (p21 ph4):f2 )

5 d21

(center (p2 ph6) (p22 ph16):f2 )

d21 ipp6 ipp16

lo to 5 times l4

DELTA1

(p2 ph1)

p16:gp3

d16 pl16:f2

4u BLKGRAD

```

go=2 ph31 cpd3:f2
d1 do:f2 mc #0 to 2
    F1EA(calgrad(EA), caldel(d0, +in0) & calph(ph3, +180) & calph(ph31, +180))
d31
exit

```

```

ph1=0
ph2=1
ph3=0 2
ph4=0 0 0 0 2 2 2 2
ph5=0 0 2 2
ph6=0 1 0 1 1 0 1 0 2 3 2 3 3 2 3 2
ph16=0 1 0 1 1 0 1 0 2 3 2 3 3 2 3 2
ph31=0 2 0 2 2 0 2 0

```

```

;p11 : f1 channel - power level for pulse (default)
;p12 : f2 channel - power level for pulse (default)
;p13 : f3 channel - power level for pulse (default)
;p112: f2 channel - power level for CPD/BB decoupling
;p116: f3 channel - power level for CPD/BB decoupling
;sp13: f2 channel - shaped pulse 180 degree (adiabatic)
;spnam13: Crp60,0.5,20.1
;p1 : f1 channel - 90 degree high power pulse
;p2 : f1 channel - 180 degree high power pulse
;p8 : f2 channel - 180 degree shaped pulse for inversion (adiabatic)
;    = 500usec for Crp60,0.5,20.1
;p16: homospoil/gradient pulse [1 msec]
;p21: f3 channel - 90 degree high power pulse
;p22: f3 channel - 180 degree high power pulse
;d0 : incremented delay (2D) [3 usec]
;d1 : relaxation delay; 1-5 * T1
;d11: delay for disk I/O [30 msec]
;d16: delay for homospoil/gradient recovery
;d21: delay in XY16-CPMG [100 usec]
;d26: 1/(4J(PH))

```

```

;d31: 1/(2J(PH)) as executed
;cnst4: = J(PH) [20 Hz]
;o2p: 77 ppm
;o3p: 0 ppm
;l4: loop for XY16-CPMG
;inf1: 1/SW(P) = 2 * DW(P)
;in0: 1/(2 * SW(P)) = DW(P)
;nd0: 2
;ns: 4 * n
;ds: >= 32
;td1: number of experiments
;FnMODE: echo-antiecho
;cpd2: decoupling according to sequence defined by cpdprg2
;cpd3: decoupling according to sequence defined by cpdprg3
;pcpd2: f2 channel - 90 degree pulse for decoupling sequence
;pcpd3: f3 channel - 90 degree pulse for decoupling sequence
;use gradient ratio: gp 1 : gp 2 : gp 3
; 50 : 80 : 32.4 for P-31
;for z-only gradients:
;gpz1: 10%
;gpz2: 80%
;gpz3: 32.4% for P-31
;use gradient files:
;gpnam1: SMSQ10.100
;gpnam2: SMSQ10.100
;gpnam3: SMSQ10.100
;$Id: na_hsqcetf3gpxy,v 1.6 2015/07/20 11:20:57 ber Exp $

```

*Pulse program code for  $^1\text{H}$ - $^{31}\text{P}$  CPMG-HSQC-  $T_2$*

```

;$CLASS=HighRes
;$DIM=2D

```

```

;$TYPE=
;$SUBTYPE=
;$COMMENT=
prosol relations=<triple_na>
#include <Avance.incl>
#include <Grad.incl>
#include <Delay.incl>
"p2=p1*2"
"p22=p21*2"
"d11=30m"
"d26=1s/(cnst4*4)"
"d0=3u"
"in0=inf1/2"
"DELTA1=p16+d16+4u"
"DELTA3=d27-p2/2"
"DELTA=p16+d16+p2+d0*2"

"COUNTER=d26*2/((d21*2+larger(p2,p22))*16)"
"l4=COUNTER*16"
"d31=(d21*2+larger(p2,p22))*14"

```

```

1 ze
; d11 pl16:f3
;2 d1 do:f3
;3 50u pl3:f3 UNBLKGRAD
    d11 pl16:f2
2 d1 do:f2
3 50u pl3:f2 UNBLKGRAD
    20u rpp6
    20u rpp16
    (p1 ph1)
4 d21
    (center (p2 ph6) (p22 ph16):f2 )
    d21 ipp6 ipp16

```

lo to 4 times l4

(p1 ph2)

4u

p16:gp1

d16

(p21 ph3):f2

;;;;;;;;;;;;; start T2

5        d27\*2

(p21 ph10 d27\*2 p21 ph10 d27\*2 p21 ph10 d27\*2 p21 ph10):f2

DELTA3

(p2 ph1)

DELTA3

(p21 ph10 d27\*2 p21 ph10 d27\*2 p21 ph10 d27\*2 p21 ph10):f2

d27\*2

(p21 ph10 d27\*2 p21 ph10 d27\*2 p21 ph10 d27\*2 p21 ph10):f2

DELTA3

(p2 ph1)

DELTA3

(p21 ph10 d27\*2 p21 ph10 d27\*2 p21 ph10 d27\*2 p21 ph10):f2

lo to 5 times l27

;;;;;;;;;;;;; end T2

d0

(p2 ph5)

; d0

p16:gp2\*EA

d16

(p22 ph4):f2

DELTA

(ralign (p1 ph1) (p21 ph4):f2 )

6 d21

(center (p2 ph6) (p22 ph16):f2 )

d21 ipp6 ipp16

lo to 6 times l4

DELTA1

(p2 ph1)

p16:gp3

d16 p16:f2

4u BLKGRAD

go=2 ph31 cpd3:f2

d1 do:f2 mc #0 to 2

F1EA(calgrad(EA), caldel(d0, +in0) & calph(ph3, +180) & calph(ph31, +180))

d31

exit

ph1=0

ph2=1

ph3=0 2

ph4=0 0 0 0 2 2 2 2

ph5=0 0 2 2

ph6=0 1 0 1 1 0 1 0 2 3 2 3 3 2 3 2

ph10=0 0 0 0 2 2 2 2

ph16=0 1 0 1 1 0 1 0 2 3 2 3 3 2 3 2

ph31=0 2 0 2 2 0 2 0

;p11 : f1 channel - power level for pulse (default)

;p12 : f2 channel - power level for pulse (default)

;p13 : f3 channel - power level for pulse (default)

;p112: f2 channel - power level for CPD/BB decoupling

;p116: f3 channel - power level for CPD/BB decoupling

;sp13: f2 channel - shaped pulse 180 degree (adiabatic)

;spnam13: Crp60,0.5,20.1

;l27: CPMG loop counter

;p1 : f1 channel - 90 degree high power pulse

;p2 : f1 channel - 180 degree high power pulse

;p8 : f2 channel - 180 degree shaped pulse for inversion (adiabatic)

; = 500usec for Crp60,0.5,20.1

;p16: homospoil/gradient pulse [1 msec]

```

;p21: f3 channel - 90 degree high power pulse
;p22: f3 channel - 180 degree high power pulse
;d0 : incremented delay (2D) [3 usec]
;d1 : relaxation delay; 1-5 * T1
;d11: delay for disk I/O [30 msec]
;d16: delay for homospoil/gradient recovery
;d21: delay in XY16-CPMG [100 usec]
;d26: 1/(4J(PH))
;d31: 1/(2J(PH)) as executed
;cnst4: = J(PH) [20 Hz]
;o2p: 77 ppm
;o3p: 0 ppm
;l4: loop for XY16-CPMG
;inf1: 1/SW(P) = 2 * DW(P)
;in0: 1/(2 * SW(P)) = DW(P)
;nd0: 2
;ns: 4 * n
;ds: >= 32
;td1: number of experiments
;FnMODE: echo-antiecho
;cpd2: decoupling according to sequence defined by cpdprg2
;cpd3: decoupling according to sequence defined by cpdprg3
;pcpd2: f2 channel - 90 degree pulse for decoupling sequence
;pcpd3: f3 channel - 90 degree pulse for decoupling sequence
;use gradient ratio: gp 1 : gp 2 : gp 3
; 50 : 80 : 32.4 for P-31
;for z-only gradients:
;gpz1: 10%
;gpz2: 80%
;gpz3: 32.4% for P-31
;use gradient files:
;gpnam1: SMSQ10.100
;gpnam2: SMSQ10.100
;gpnam3: SMSQ10.100

```

;\$Id: na\_hsqcctf3gpxy,v 1.6 2015/07/20 11:20:57 ber Exp \$

## References

- 1 Felli, I. C. & Pierattelli, R. Novel methods based on <sup>13</sup>C detection to study intrinsically disordered proteins. *Journal of Magnetic Resonance* **241**, 115-125, doi:10.1016/j.jmr.2013.10.020 (2014).
- 2 Gil, S. *et al.* NMR spectroscopic studies of intrinsically disordered proteins at near-physiological conditions. *Angew Chem Int Ed Engl* **52**, 11808-11812, doi:10.1002/anie.201304272 (2013).
- 3 Rule, G. & Hitchens, K. *Fundamentals of Protein NMR Spectroscopy*. 1st edn, (Springer, Dordrecht, 2006).
- 4 Gascoigne, L. *et al.* Fractal-like R5 assembly promote the condensation of silicic acid into silica particles. *J Colloid Interface Sci* **598**, 206-212, doi:10.1016/j.jcis.2021.04.030 (2021).
- 5 Rubinstein, M. & Colby, R. H. *Polymer physics*. Vol. 23 (Oxford university press New York, 2003).
- 6 Daus, F., Xie, X. & Geyer, A. The silica mineralisation properties of synthetic Silaffin-1A(1) (synSil-1A(1)). *Org Biomol Chem* **20**, 3387-3396, doi:10.1039/d2ob00390b (2022).
- 7 Polyansky, A. A., Gallego, L. D., Efremov, R. G., Kohler, A. & Zagrovic, B. Protein compactness and interaction valency define the architecture of a biomolecular condensate across scales. *Elife* **12**, doi:10.7554/eLife.80038 (2023).
- 8 Polyansky, A. A., Gallego, L. D., Efremov, R. G., Köhler, A. & Zagrovic, B. in *bioRxiv* (bioRxiv, 2023).
- 9 Strobl, J. *et al.* Understanding Self-Assembly of Silica-Precipitating Peptides to Control Silica Particle Morphology. *Adv Mater*, e2207586, doi:10.1002/adma.202207586 (2022).
